# Supplementary material for: Effective carrier-free gene-silencing activity of sphingosine-modified siRNAs
Source: Royal Society of Chemistry journal article supplement (doi:10.1039/d2ob02099h), 2023-01-01

## Supplementary Materials

### Effective Carrier-Free Gene-Silencing Activity of Sphingosine-Modified siRNAs

Charlene Fernandez<sup>1</sup>, Ifrodet Georgees<sup>1</sup>, Eva Goss<sup>2</sup> and Jean-Paul Desaulniers<sup>1</sup>

<sup>1</sup> Faculty of Science, University of Ontario Institute of Technology, Oshawa, Ontario, L1G 0C5, Canada

<sup>2</sup>Synthose Inc. 50 Viceroy Road Unit 7, Concord, Ontario, L4K 3A7 Canada

#### Tables

|                              |   |
|------------------------------|---|
| Supplementary Table S1 ..... | 2 |
|------------------------------|---|

#### Figures

|                              |   |
|------------------------------|---|
| Supplementary Figure 1 ..... | 3 |
|------------------------------|---|

#### NMR Spectra

|                                                                 |     |
|-----------------------------------------------------------------|-----|
| <sup>1</sup> H/ <sup>13</sup> C NMR Spectra of Compound 3 ..... | 4-5 |
|-----------------------------------------------------------------|-----|

|                                                                 |     |
|-----------------------------------------------------------------|-----|
| <sup>1</sup> H/ <sup>13</sup> C NMR Spectra of Compound 4 ..... | 6-7 |
|-----------------------------------------------------------------|-----|

|                                                                 |     |
|-----------------------------------------------------------------|-----|
| <sup>1</sup> H/ <sup>13</sup> C NMR Spectra of Compound 5 ..... | 8-9 |
|-----------------------------------------------------------------|-----|

|                                                                 |       |
|-----------------------------------------------------------------|-------|
| <sup>1</sup> H/ <sup>13</sup> C NMR Spectra of Compound 6 ..... | 10-11 |
|-----------------------------------------------------------------|-------|

|                                                                 |       |
|-----------------------------------------------------------------|-------|
| <sup>1</sup> H/ <sup>13</sup> C NMR Spectra of Compound 7 ..... | 12-13 |
|-----------------------------------------------------------------|-------|

|                                                                 |       |
|-----------------------------------------------------------------|-------|
| <sup>1</sup> H/ <sup>13</sup> C NMR Spectra of Compound 8 ..... | 14-16 |
|-----------------------------------------------------------------|-------|

|                                                                 |       |
|-----------------------------------------------------------------|-------|
| <sup>1</sup> H/ <sup>13</sup> C NMR Spectra of Compound 9 ..... | 17-22 |
|-----------------------------------------------------------------|-------|

|                                                                  |       |
|------------------------------------------------------------------|-------|
| <sup>1</sup> H/ <sup>31</sup> P NMR Spectra of Compound 10 ..... | 23-24 |
|------------------------------------------------------------------|-------|

|                                 |       |
|---------------------------------|-------|
| <b>QTOF-LC/MS spectra</b> ..... | 25-26 |
|---------------------------------|-------|

|                        |    |
|------------------------|----|
| <b>HPLC data</b> ..... | 27 |
|------------------------|----|

|                                         |    |
|-----------------------------------------|----|
| <b>Melting Temperature Curves</b> ..... | 28 |
|-----------------------------------------|----|

**Supplementary Table S1:** Negative ESI of single-strand sense and antisense strand oligonucleotides. **X** represents the propyl-triazole sphingosine modification.

| <b>Code</b>          | <b>Sequence</b>                       | <b>m/z Calculated</b> | <b>m/z Found</b> |
|----------------------|---------------------------------------|-----------------------|------------------|
| <b>S-1 sense</b>     | 5' CUU ACG CUG AGU ACU UCG AX 3' (S)  | 6451.0936             | 6451.7883        |
| <b>S-2 sense</b>     | 5' CUU ACG CUG AGU ACU UXG ATT 3' (S) | 6756.1600             | 6755.5989        |
| <b>S-3 sense</b>     | 5' CUU ACG CUG XGU ACU UCG ATT 3' (S) | 6732.1444             | 6732.4007        |
| <b>S-4 sense</b>     | 5' XUU ACG CUG AGU ACU UCG ATT 3' (S) | 6756.1600             | 6756.4147        |
| <b>S-5 antisense</b> | 3' XG AAU GCG ACU CAU GAA GCU 5' (AS) | 6619.1361             | 6619.4267        |

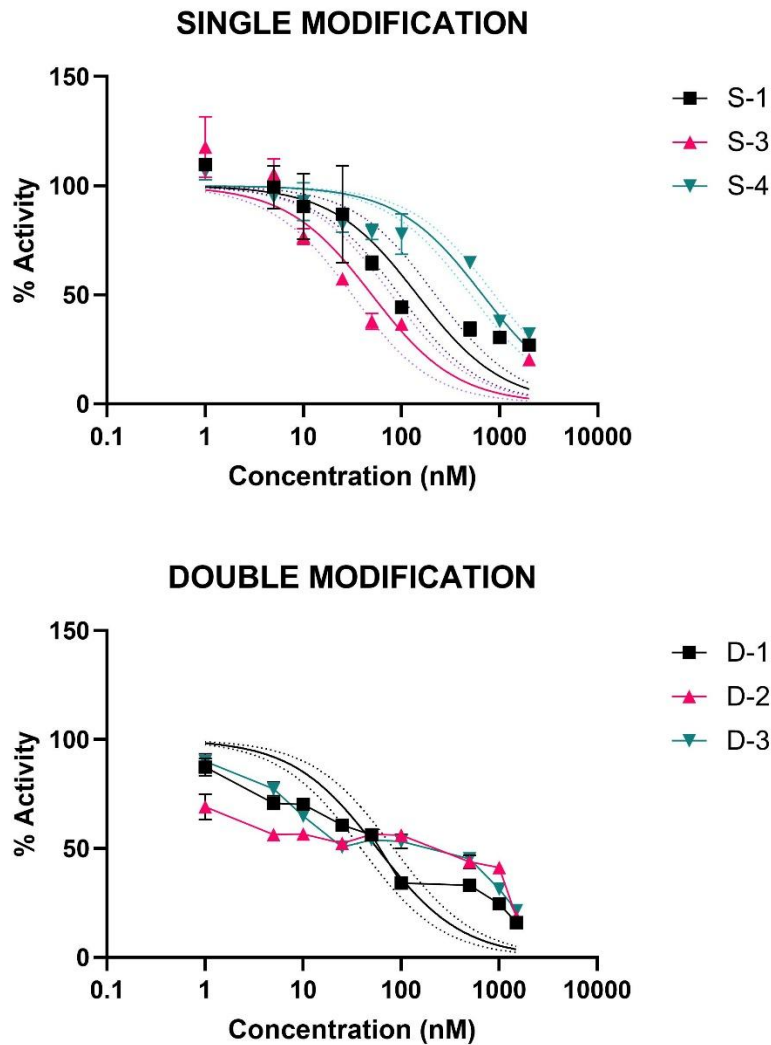

**Supplementary Figure 1.** Inhibitory dose-response curves for propyl-triazole sphingosine-conjugated siRNAs targeting exogenous firefly luciferase in HeLa cells following a carrier-free transfection protocol. **Top:** Nonlinear regression curve of single-modified siRNAs; S-1, S-3, and S-4 with 95% CI. Average of 3 technical replicates and 3 biological replicates. **Bottom:** Nonlinear regression curve of double-modified siRNAs; D-1 to D-3 with 95% CI. Average of 2 technical replicates and 3 biological replicates.

# $^1\text{H}$ NMR Spectrum of Compound 3

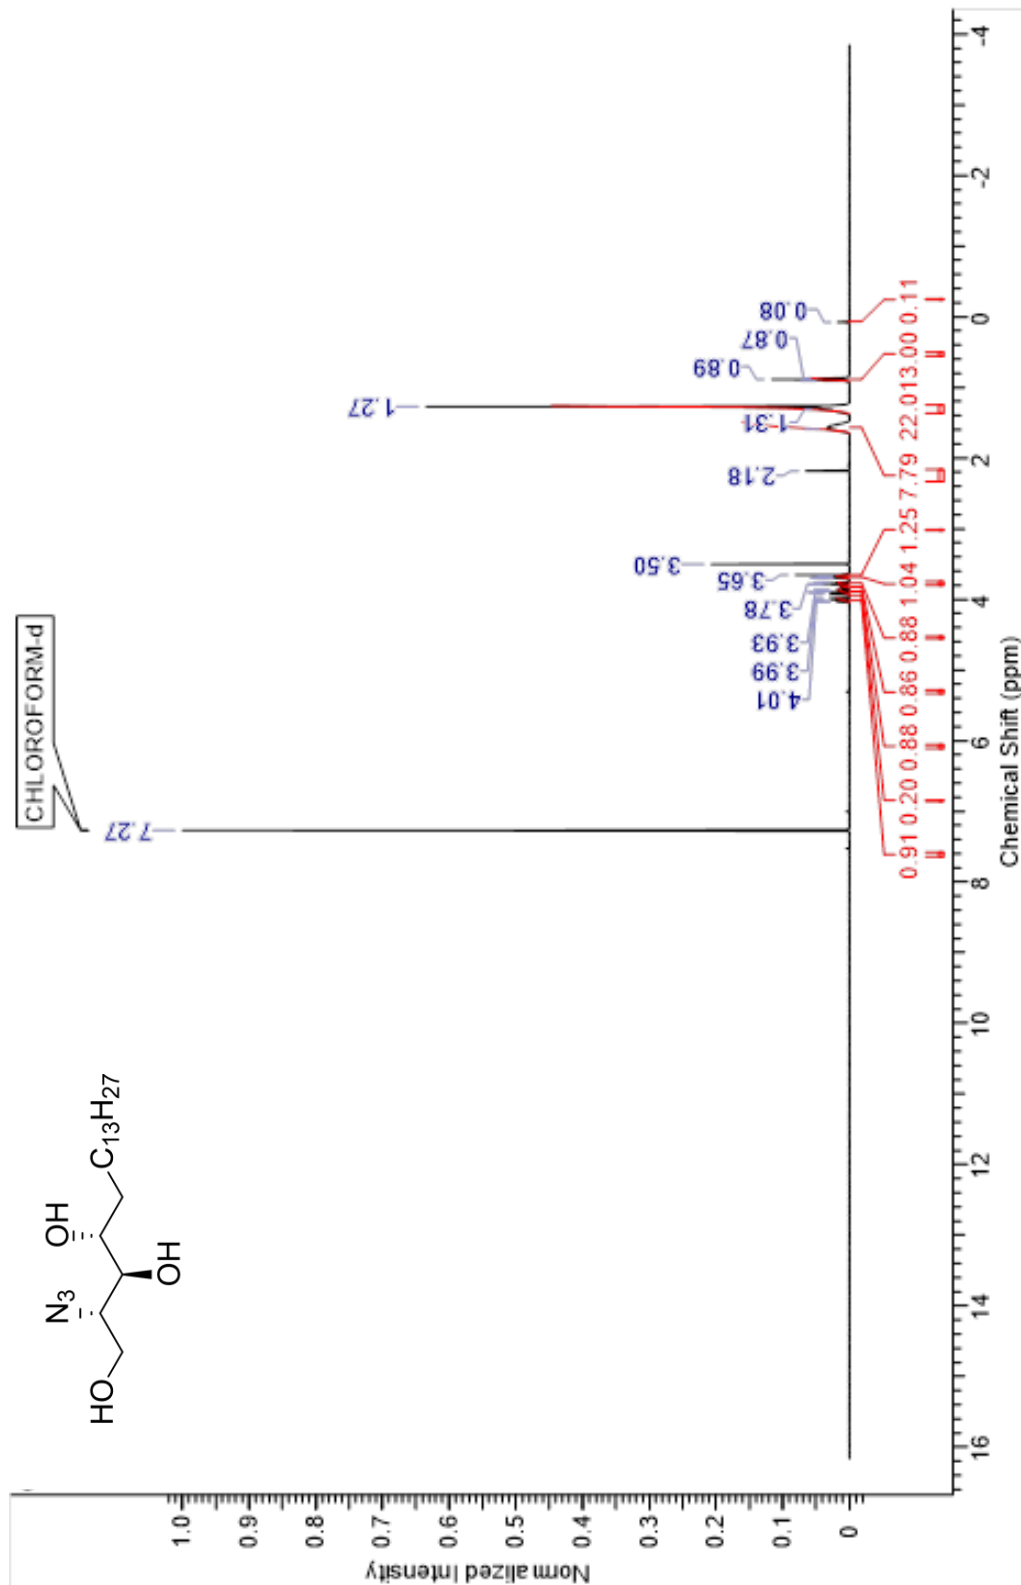

# <sup>13</sup>C NMR Spectrum of Compound 3

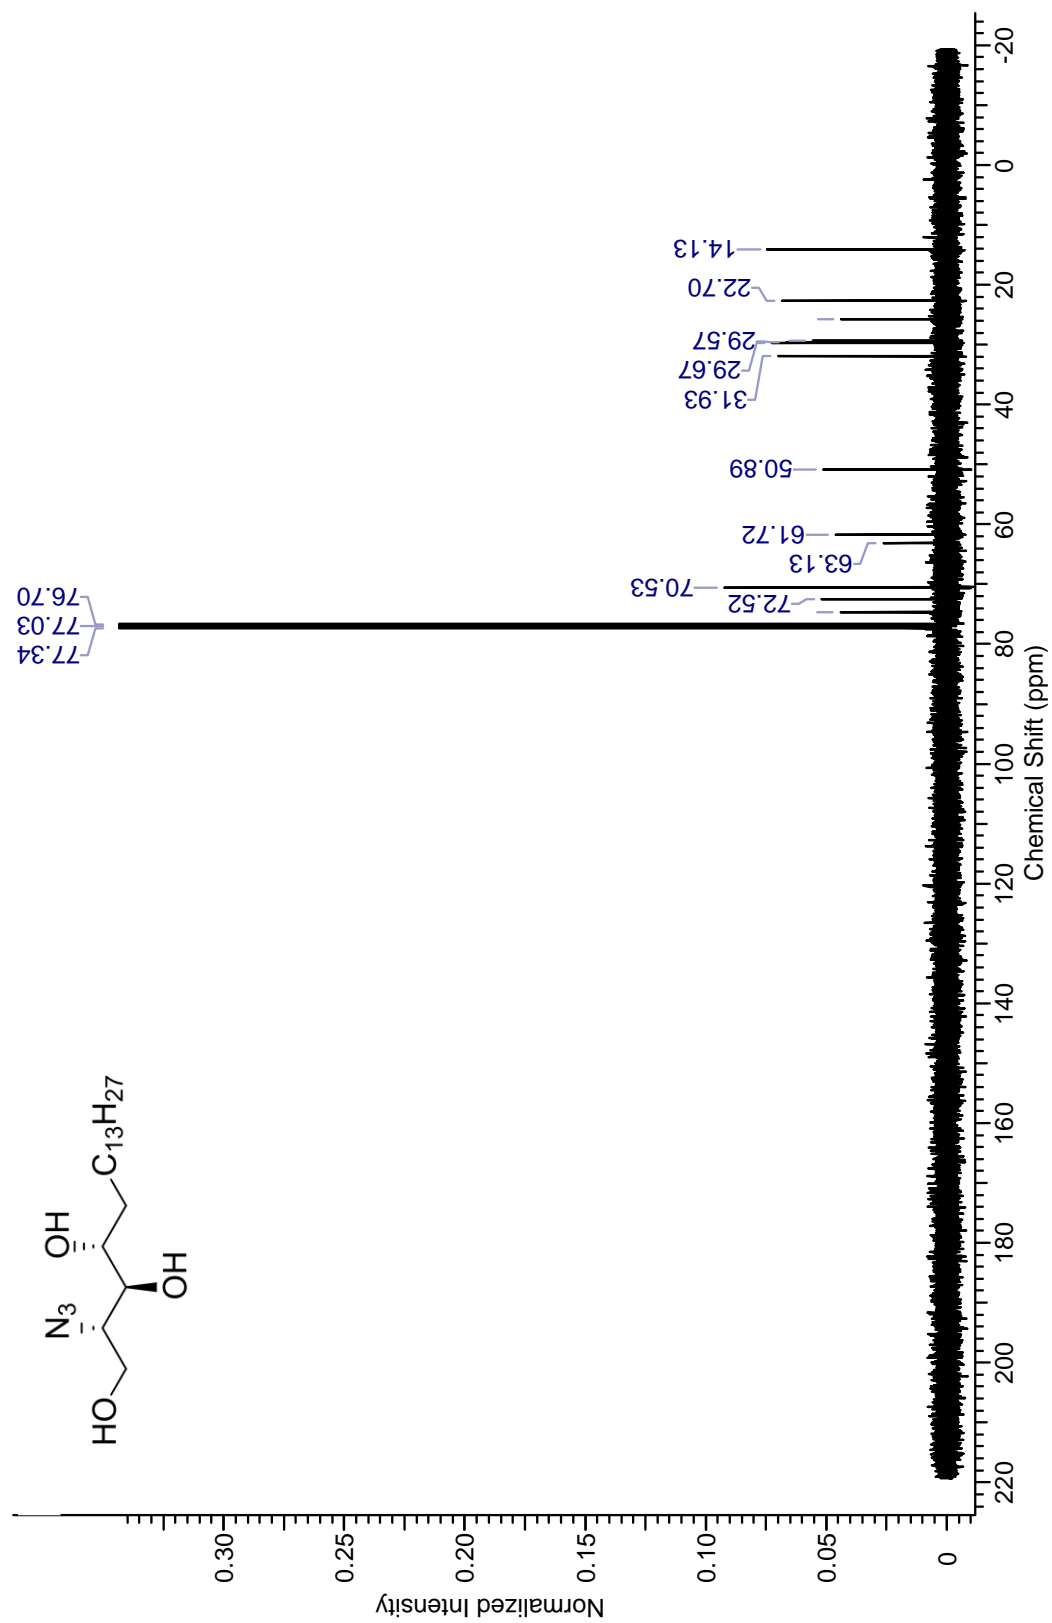

<sup>1</sup>H NMR Spectrum of Compound 4

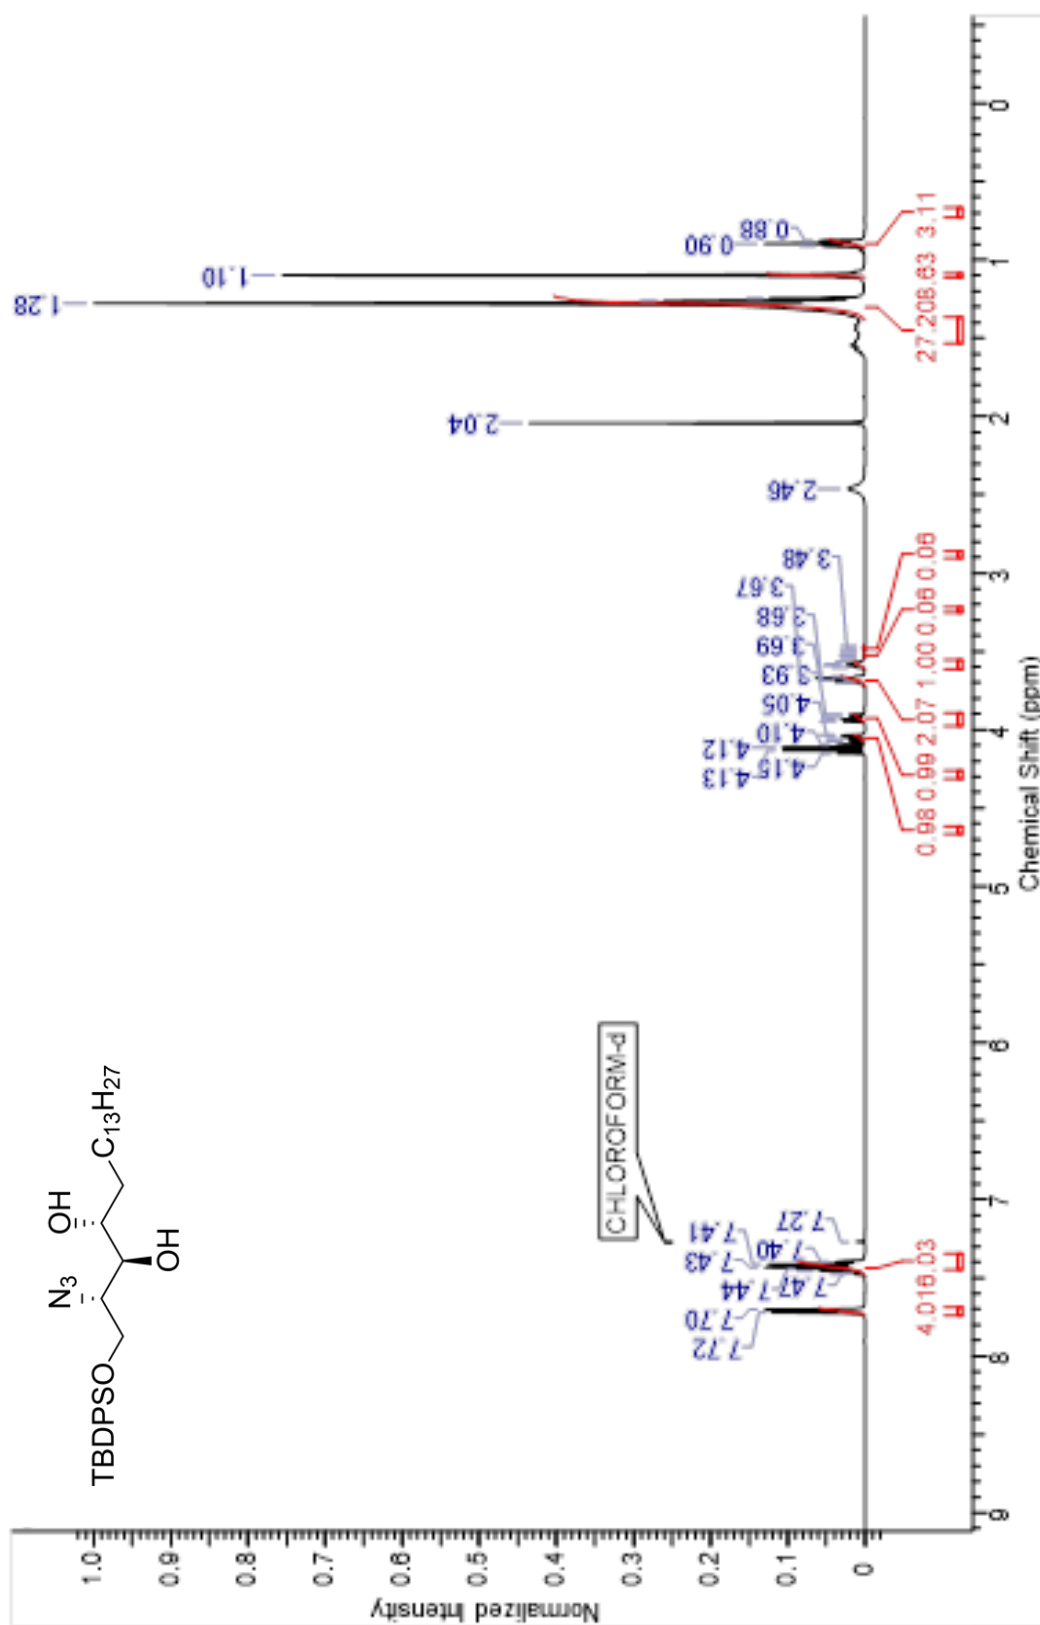

$^{13}\text{C}$  NMR Spectrum of Compound 4

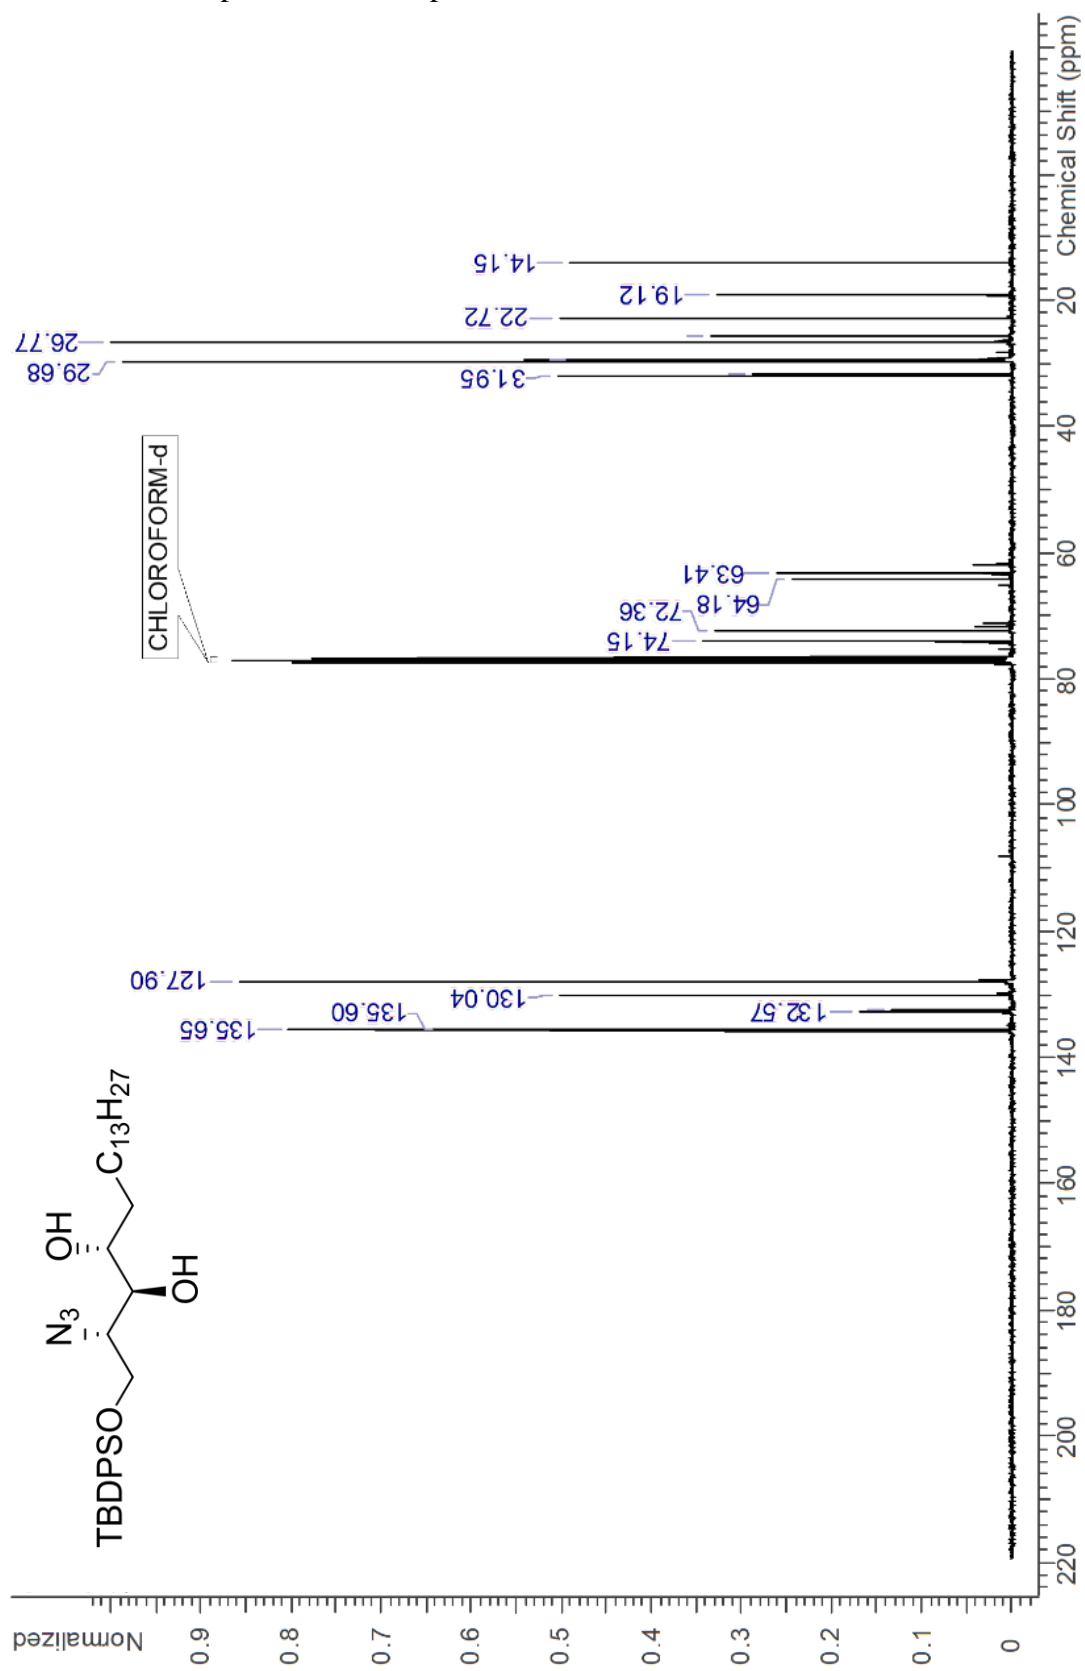

<sup>1</sup>H NMR Spectrum of Compound 5

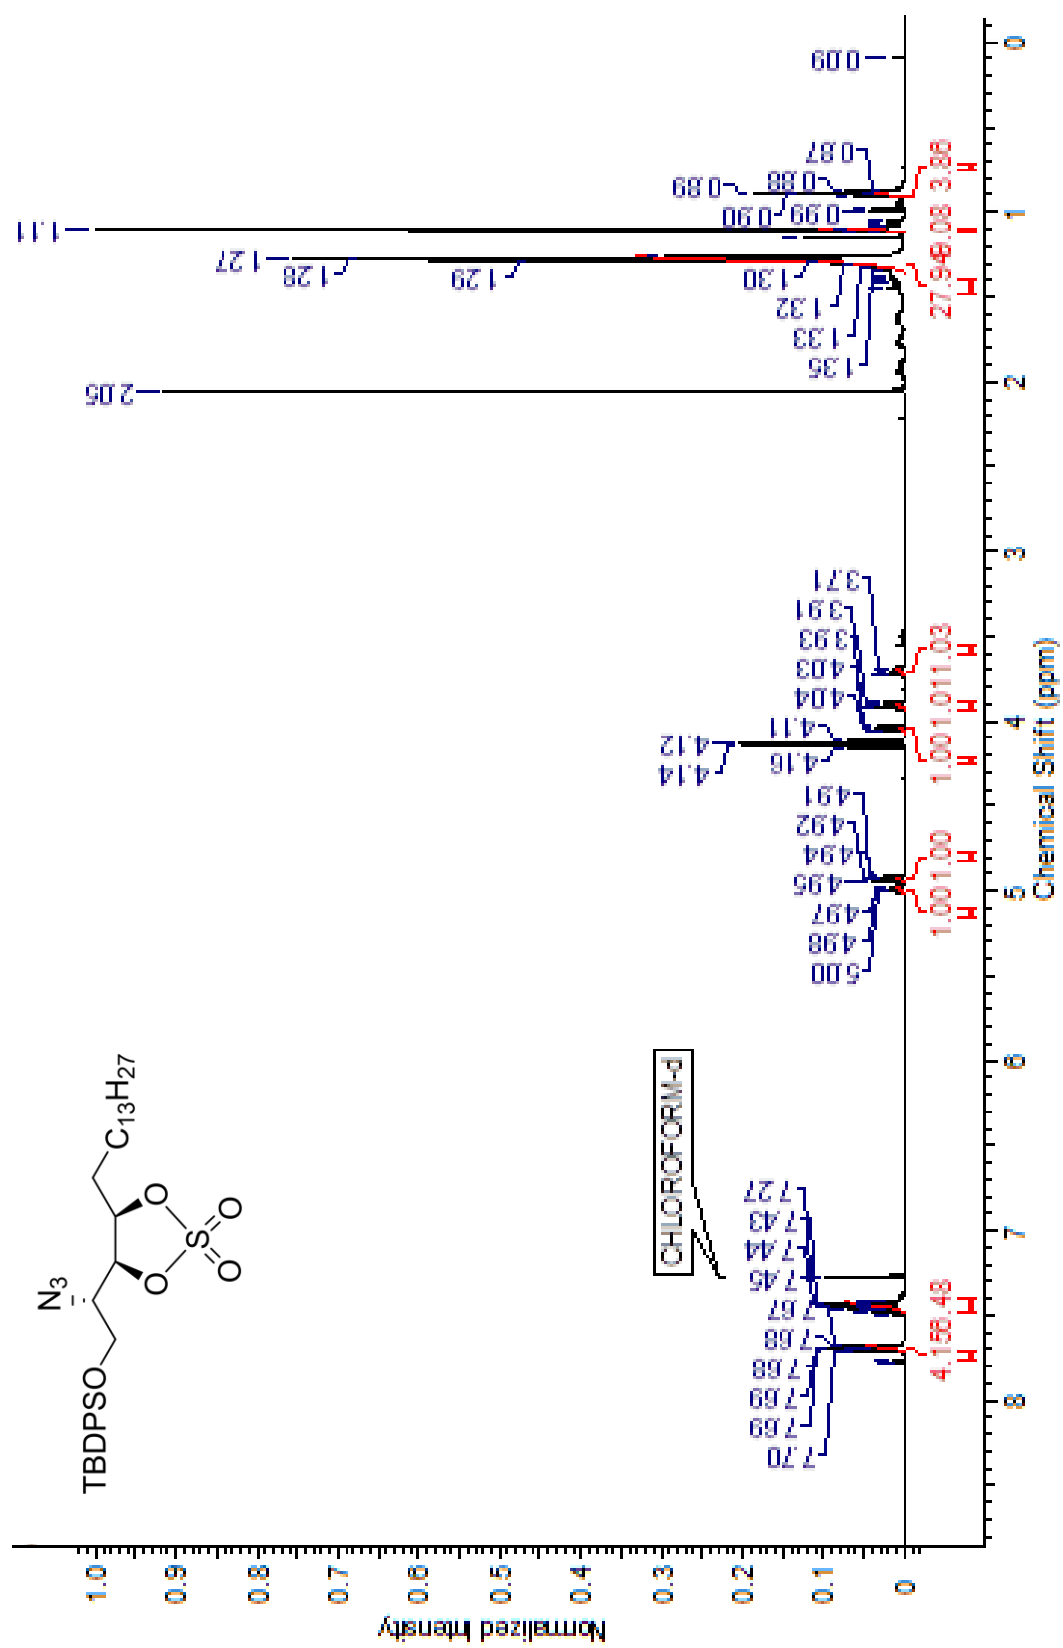



$^{13}\text{C}$  NMR Spectrum of Compound 5

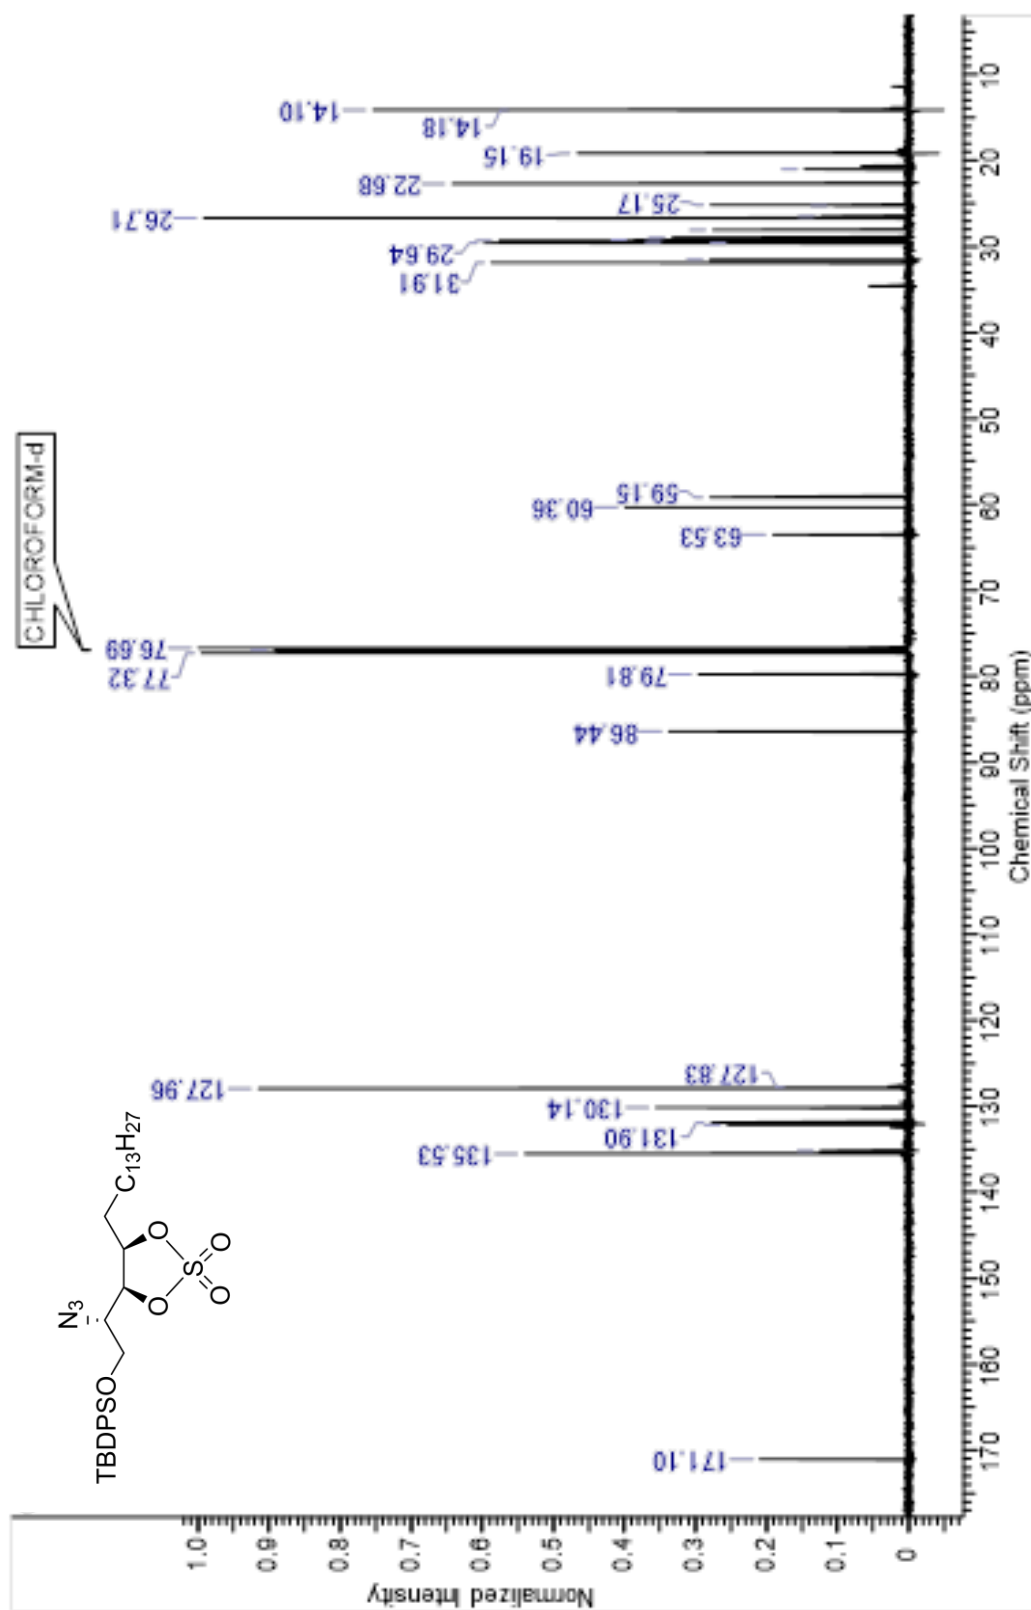

# <sup>1</sup>H NMR Spectrum of Compound 6

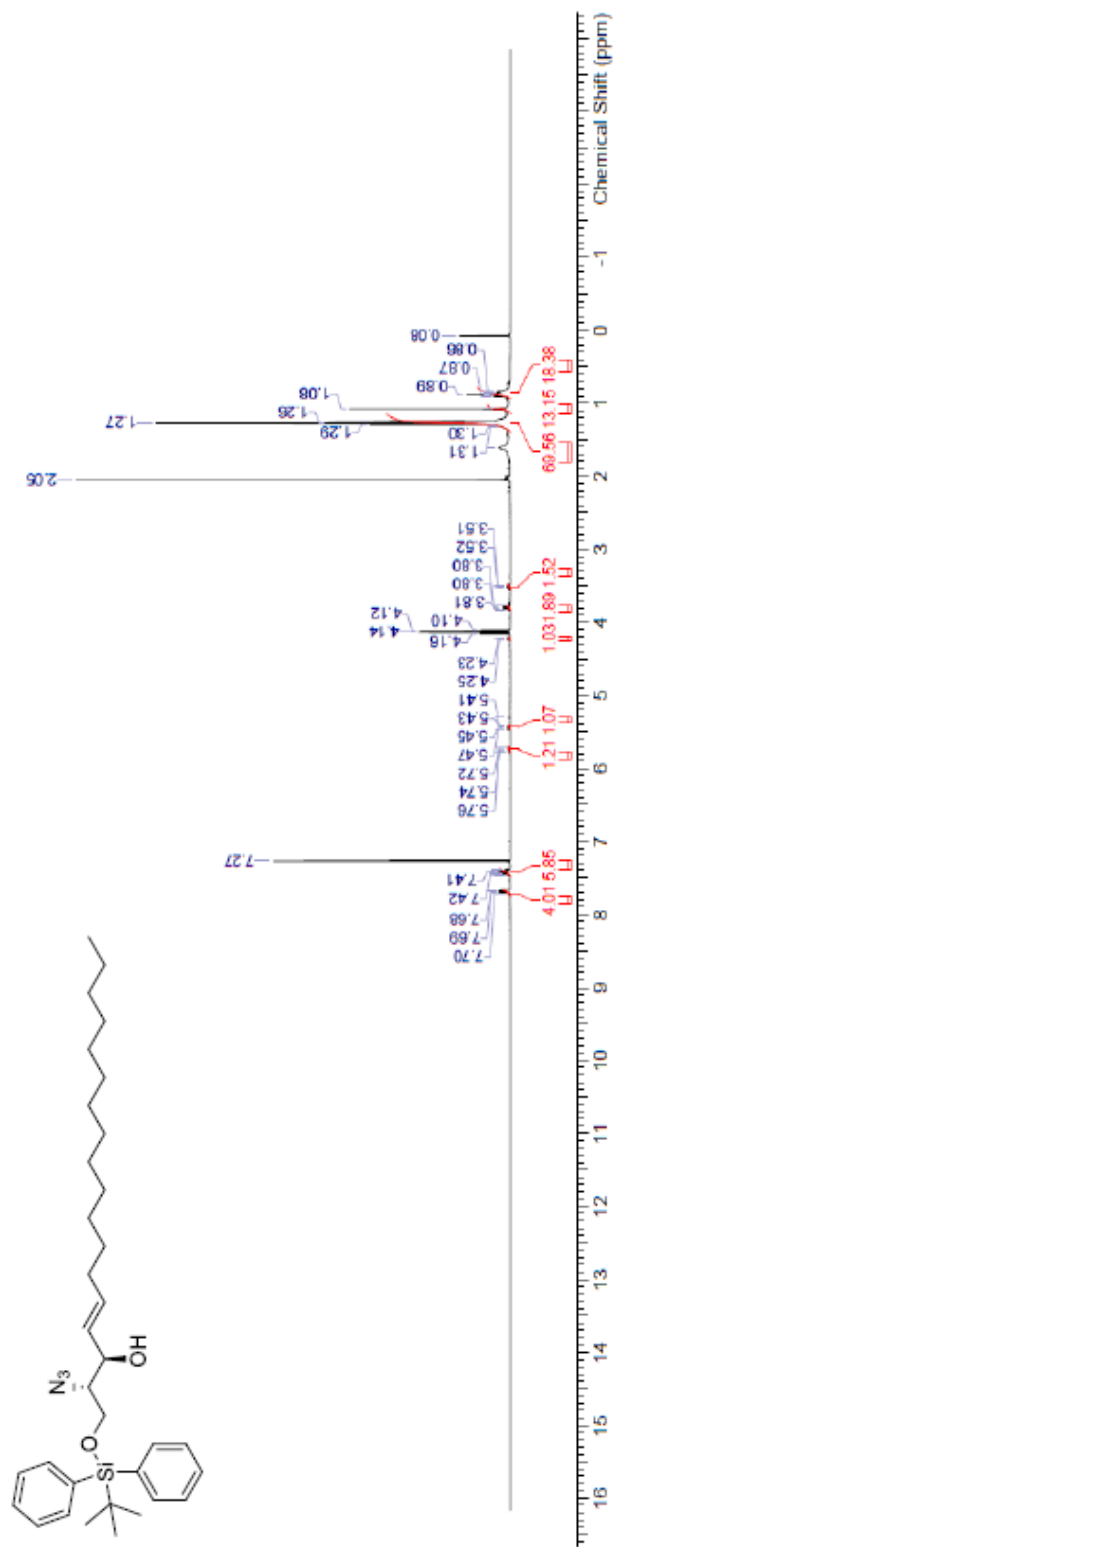

# <sup>13</sup>C NMR Spectrum of Compound 6

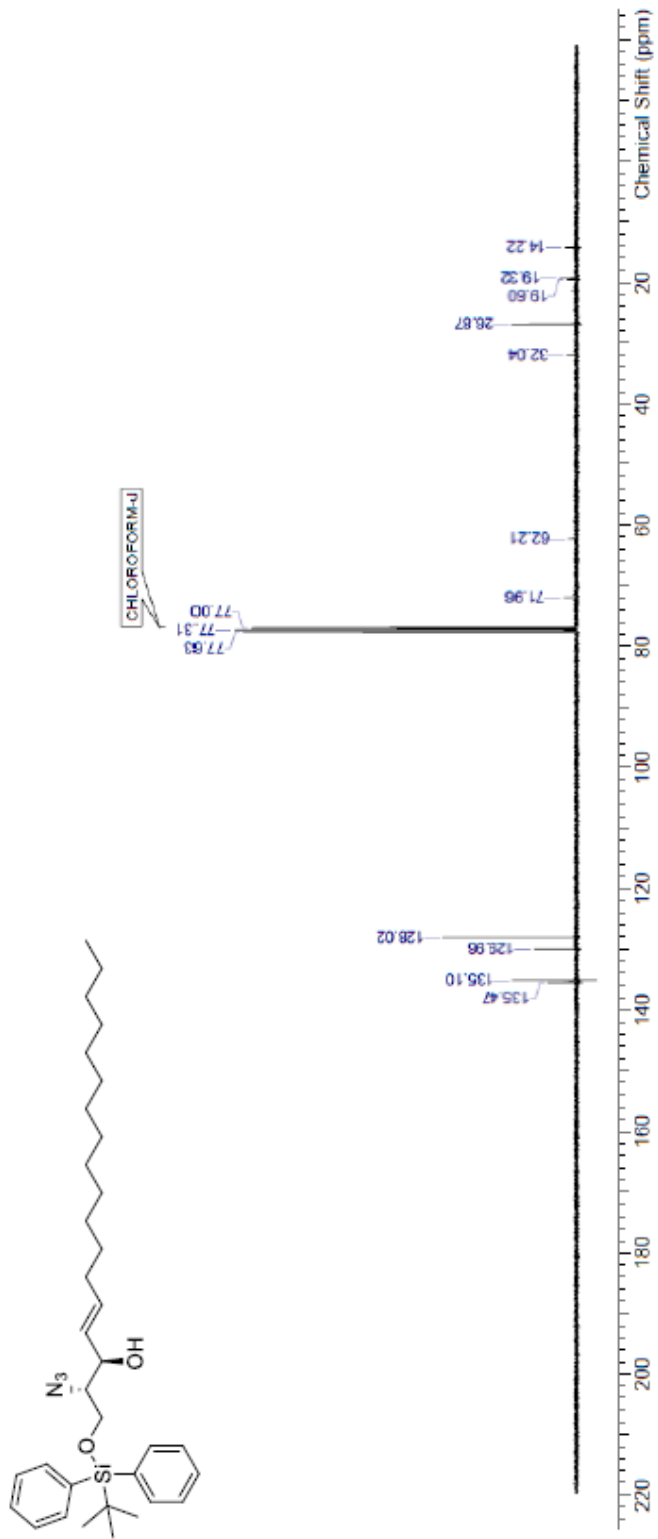

<sup>1</sup>H NMR Spectrum of Compound 7

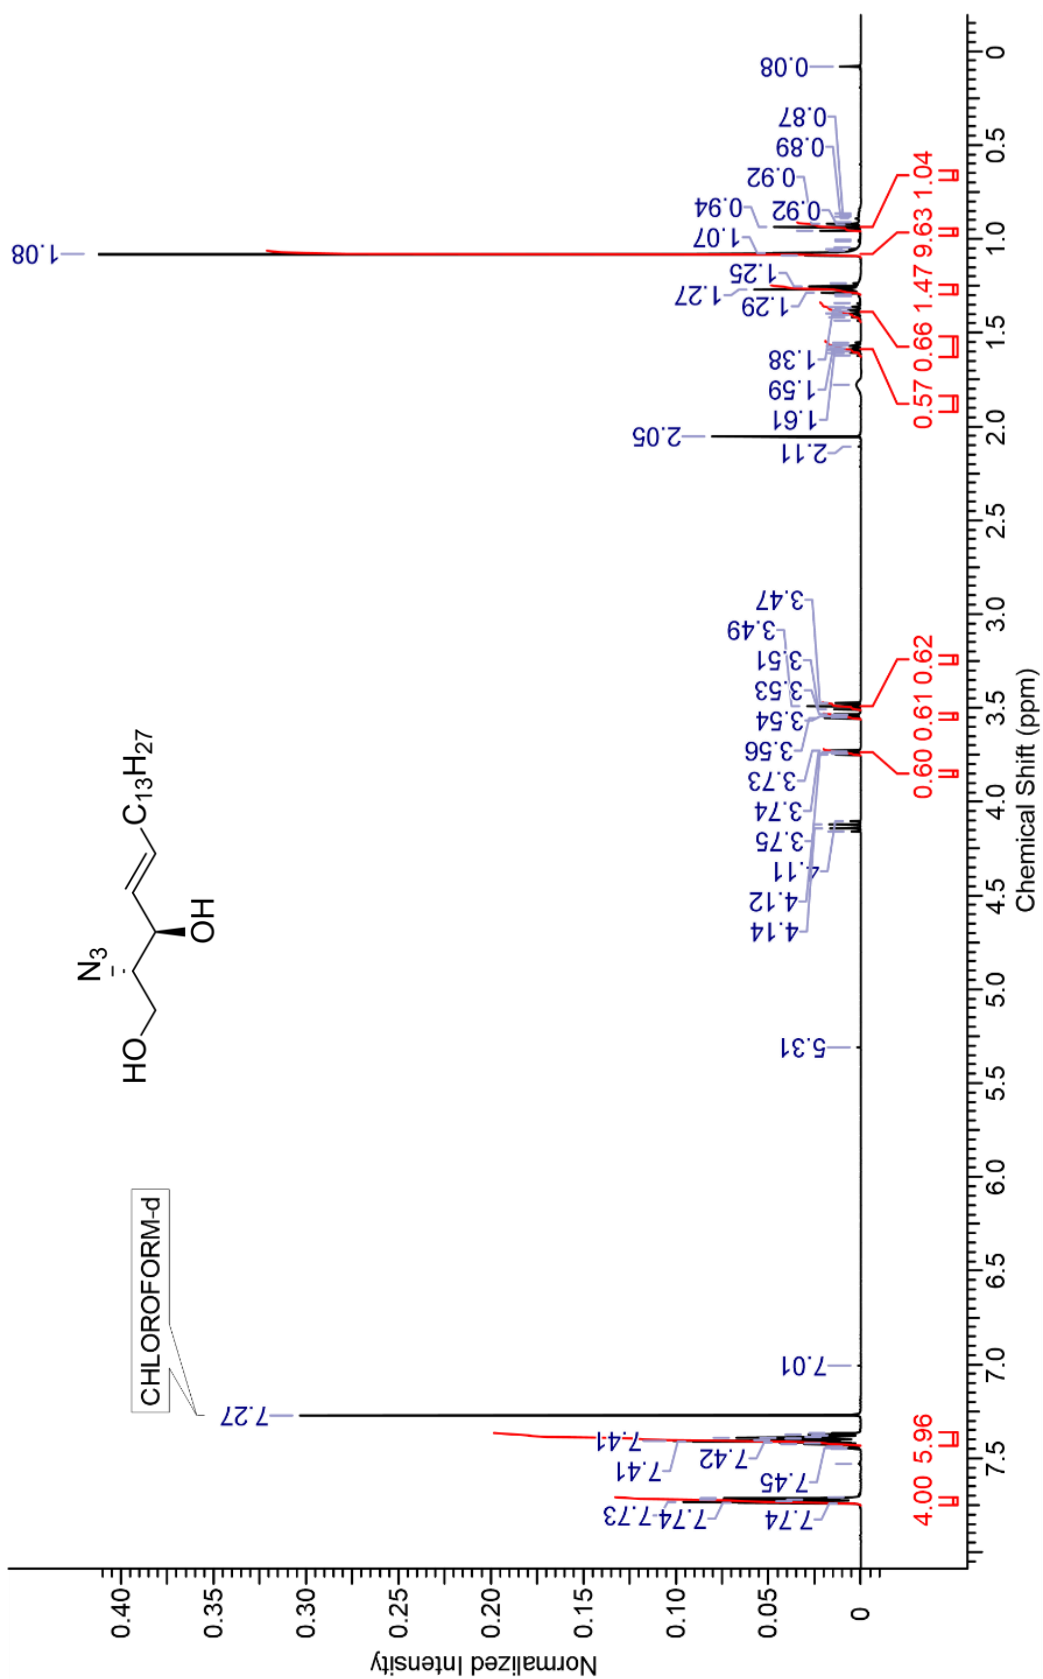

$^{13}\text{C}$  NMR Spectrum of Compound 7

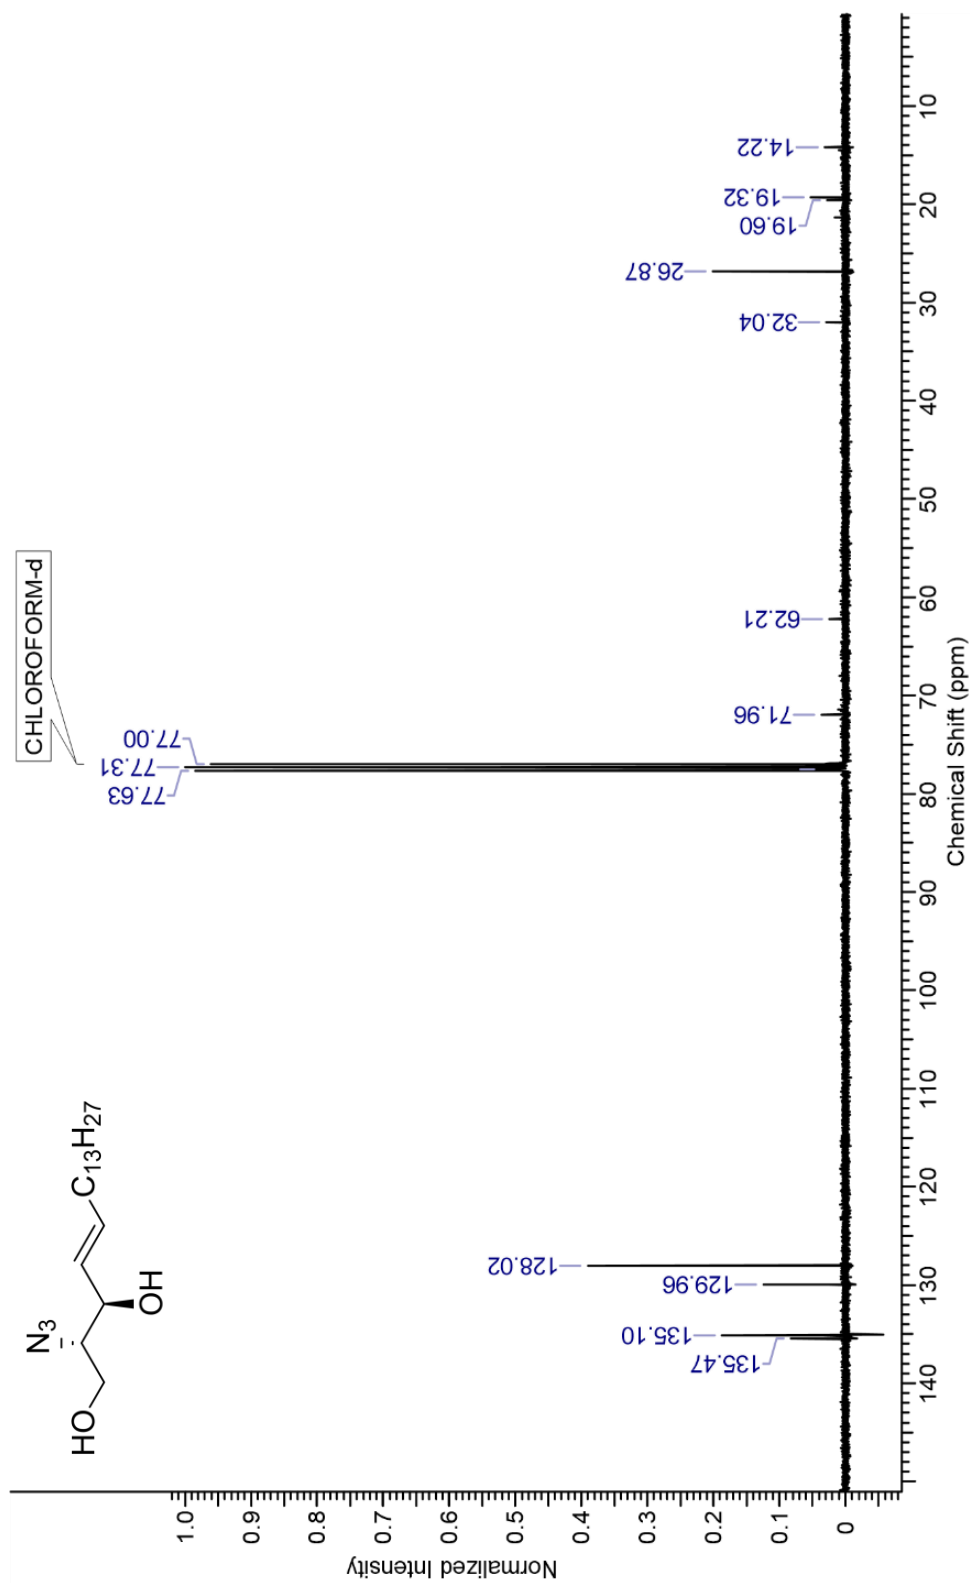

# <sup>1</sup>H NMR Spectrum of Compound 8

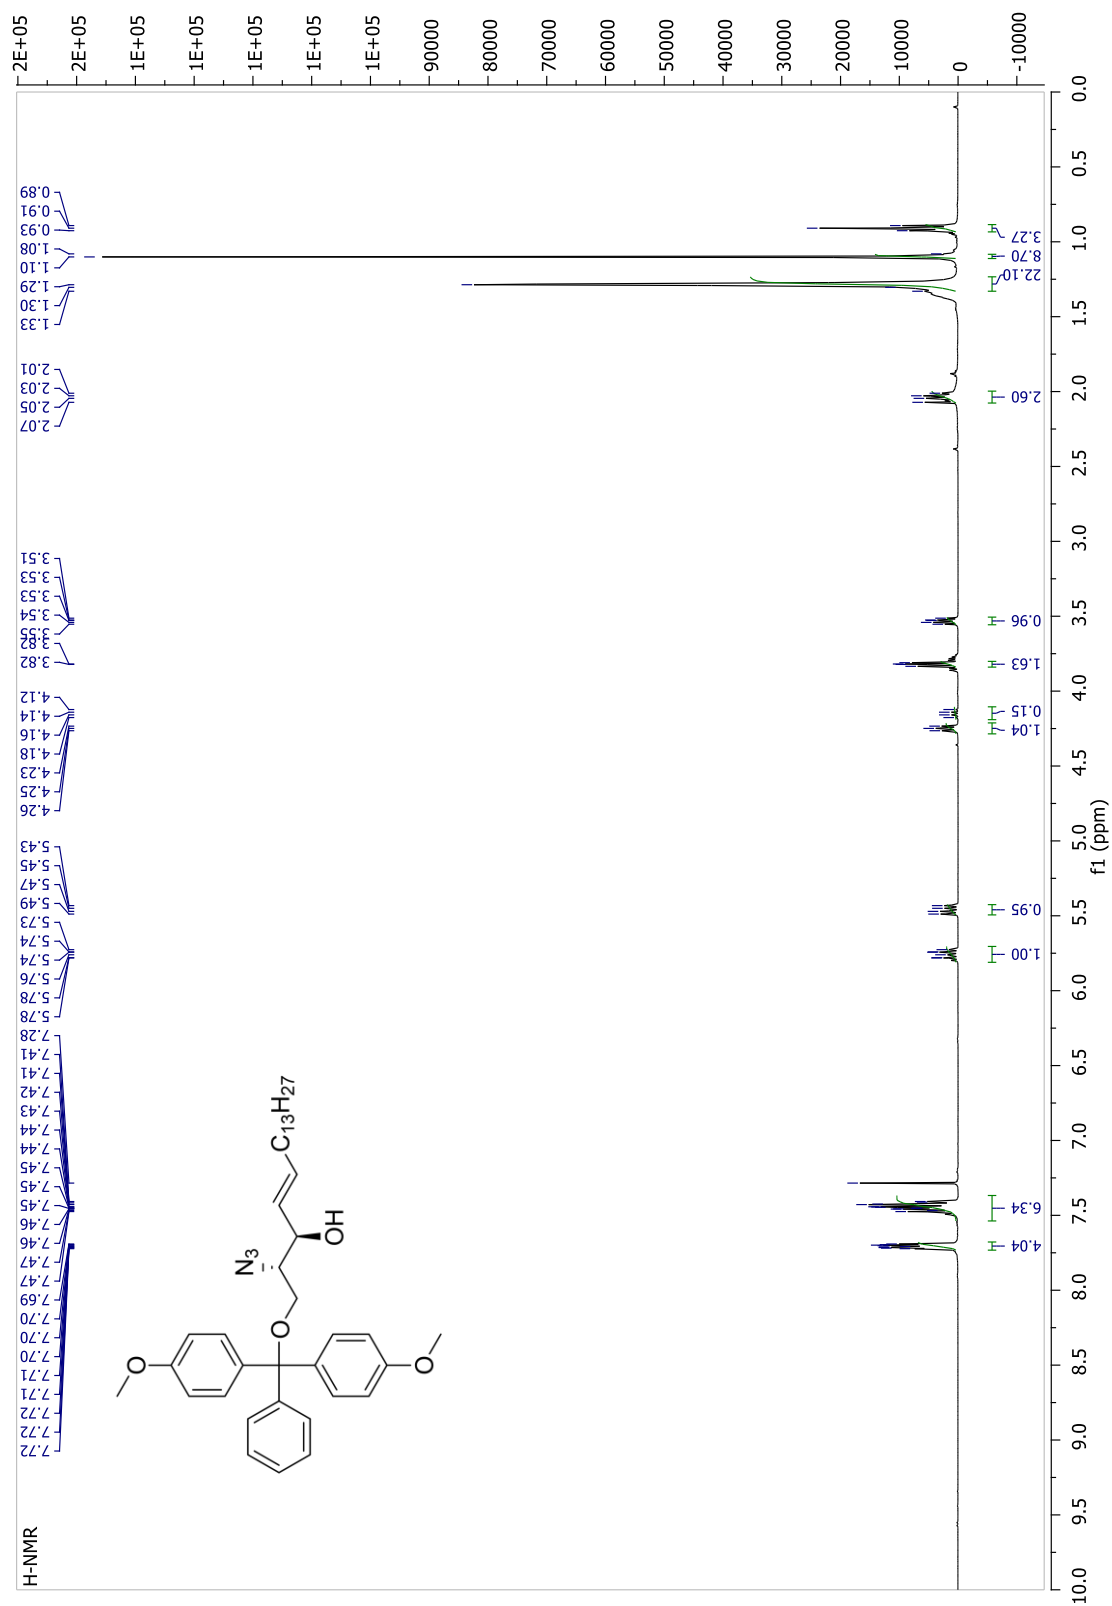

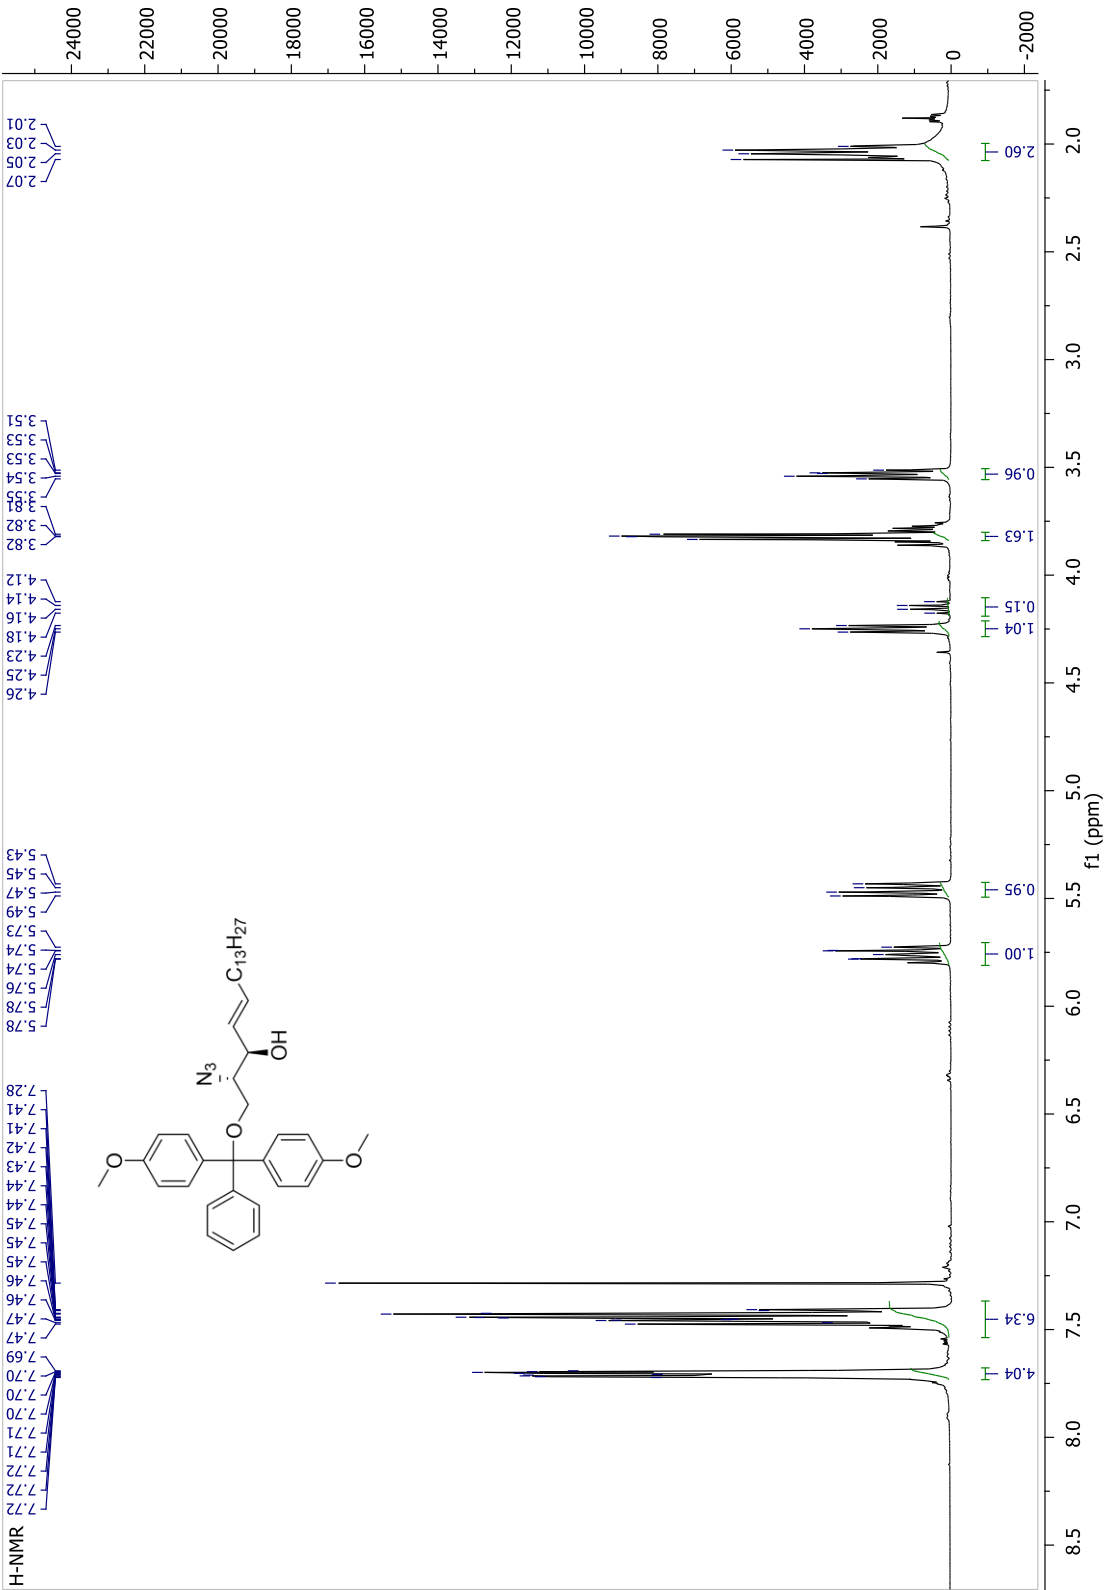

# <sup>13</sup>C NMR Spectrum of Compound 8

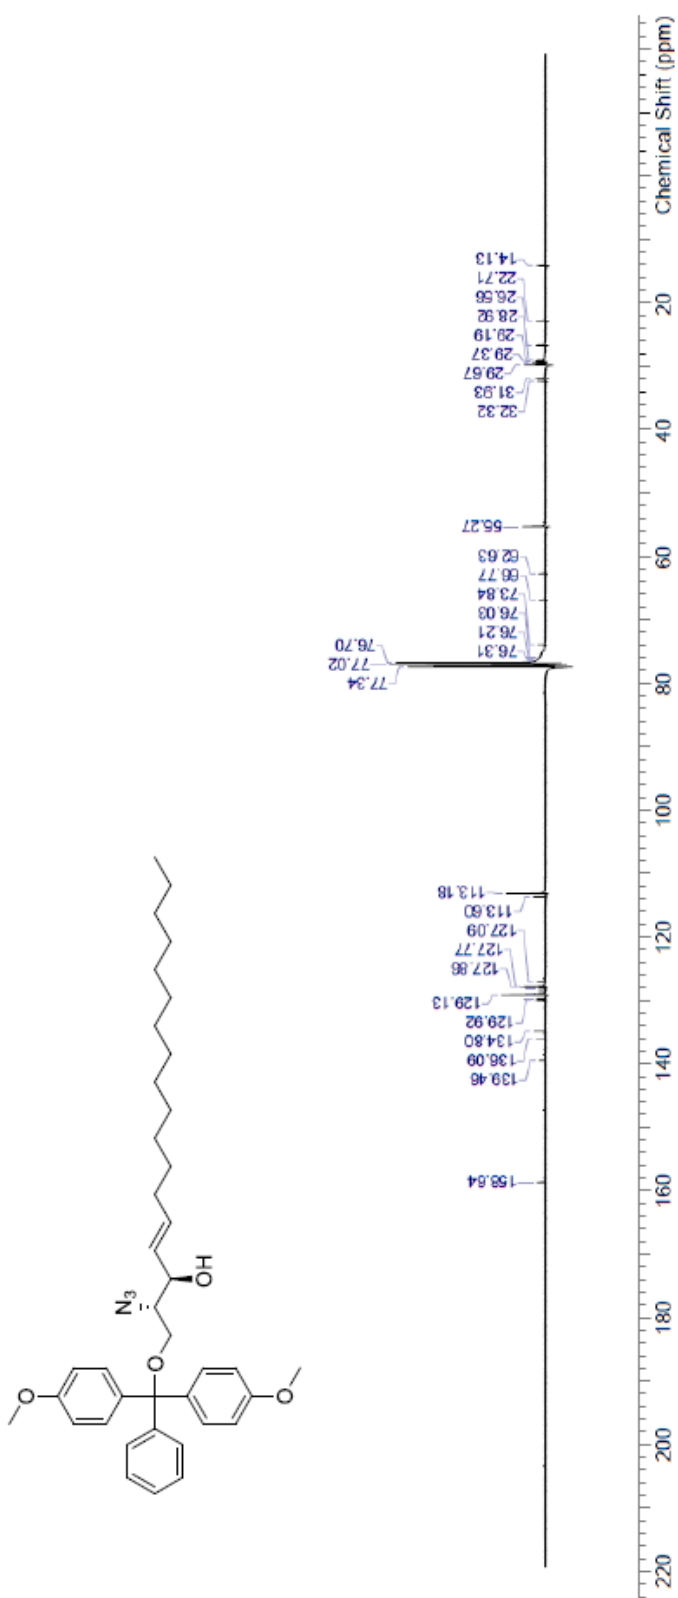



# <sup>1</sup>H NMR Spectrum of Compound 9

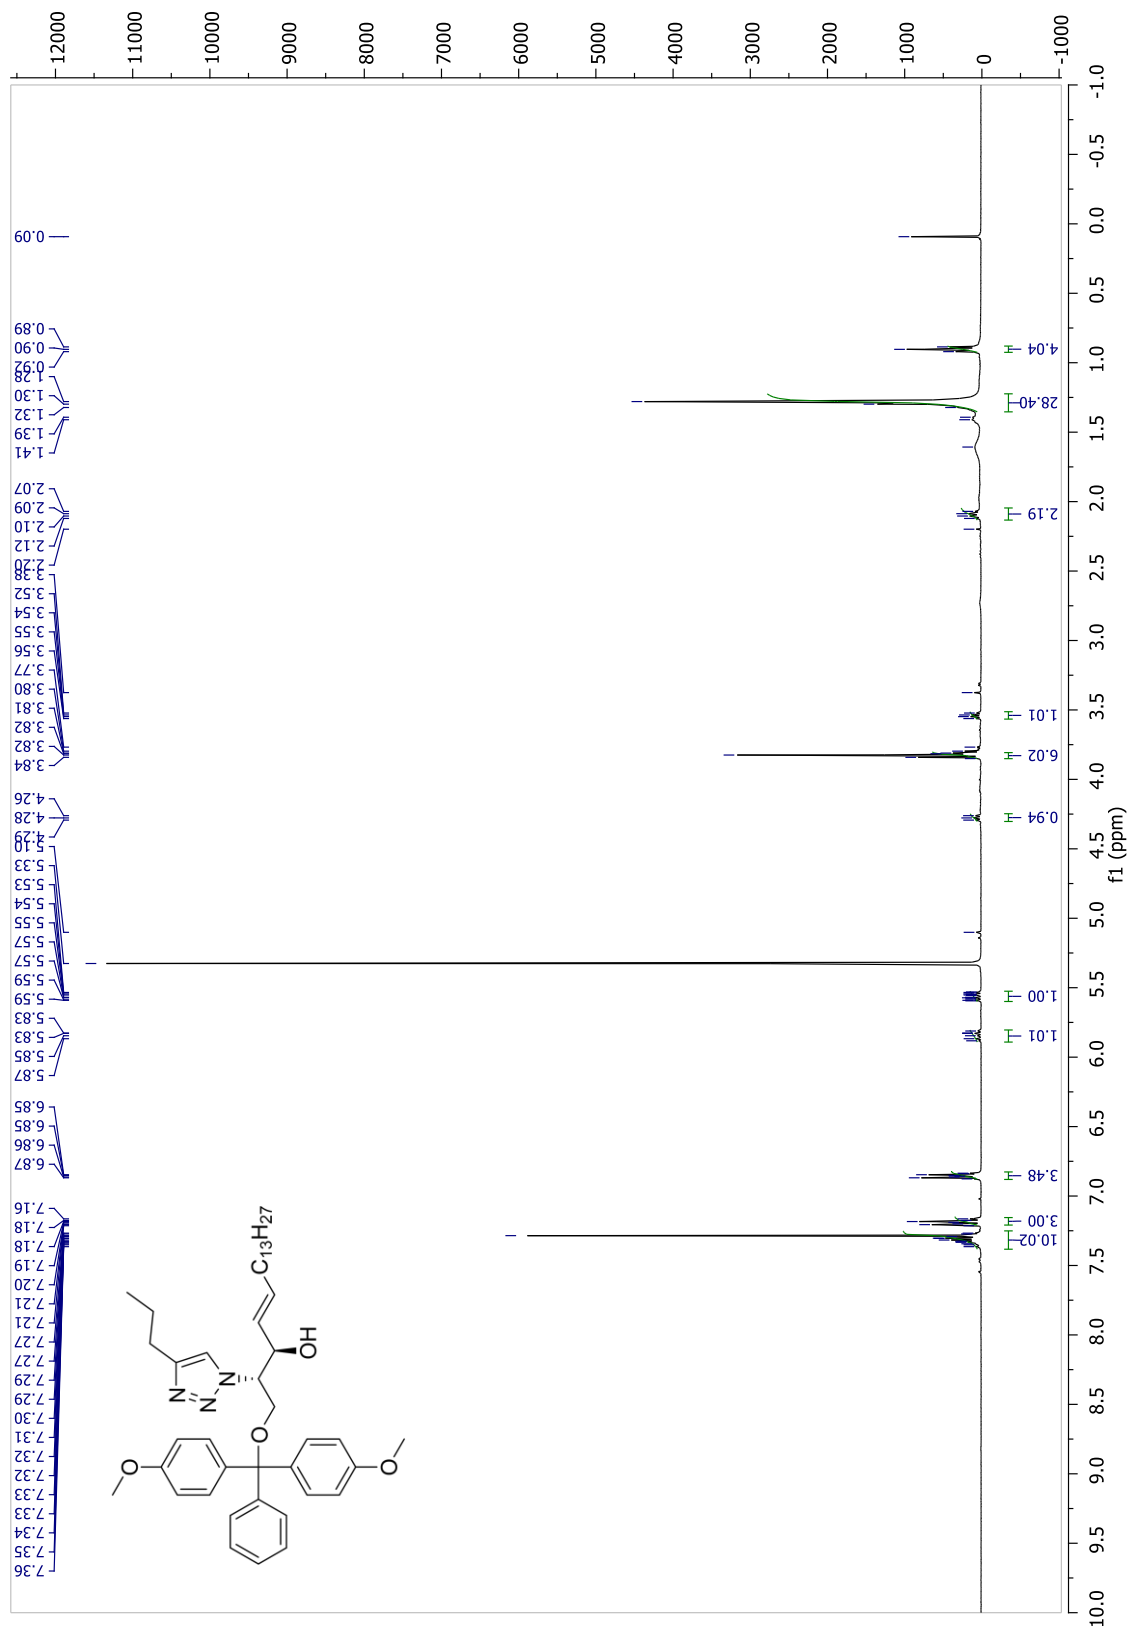

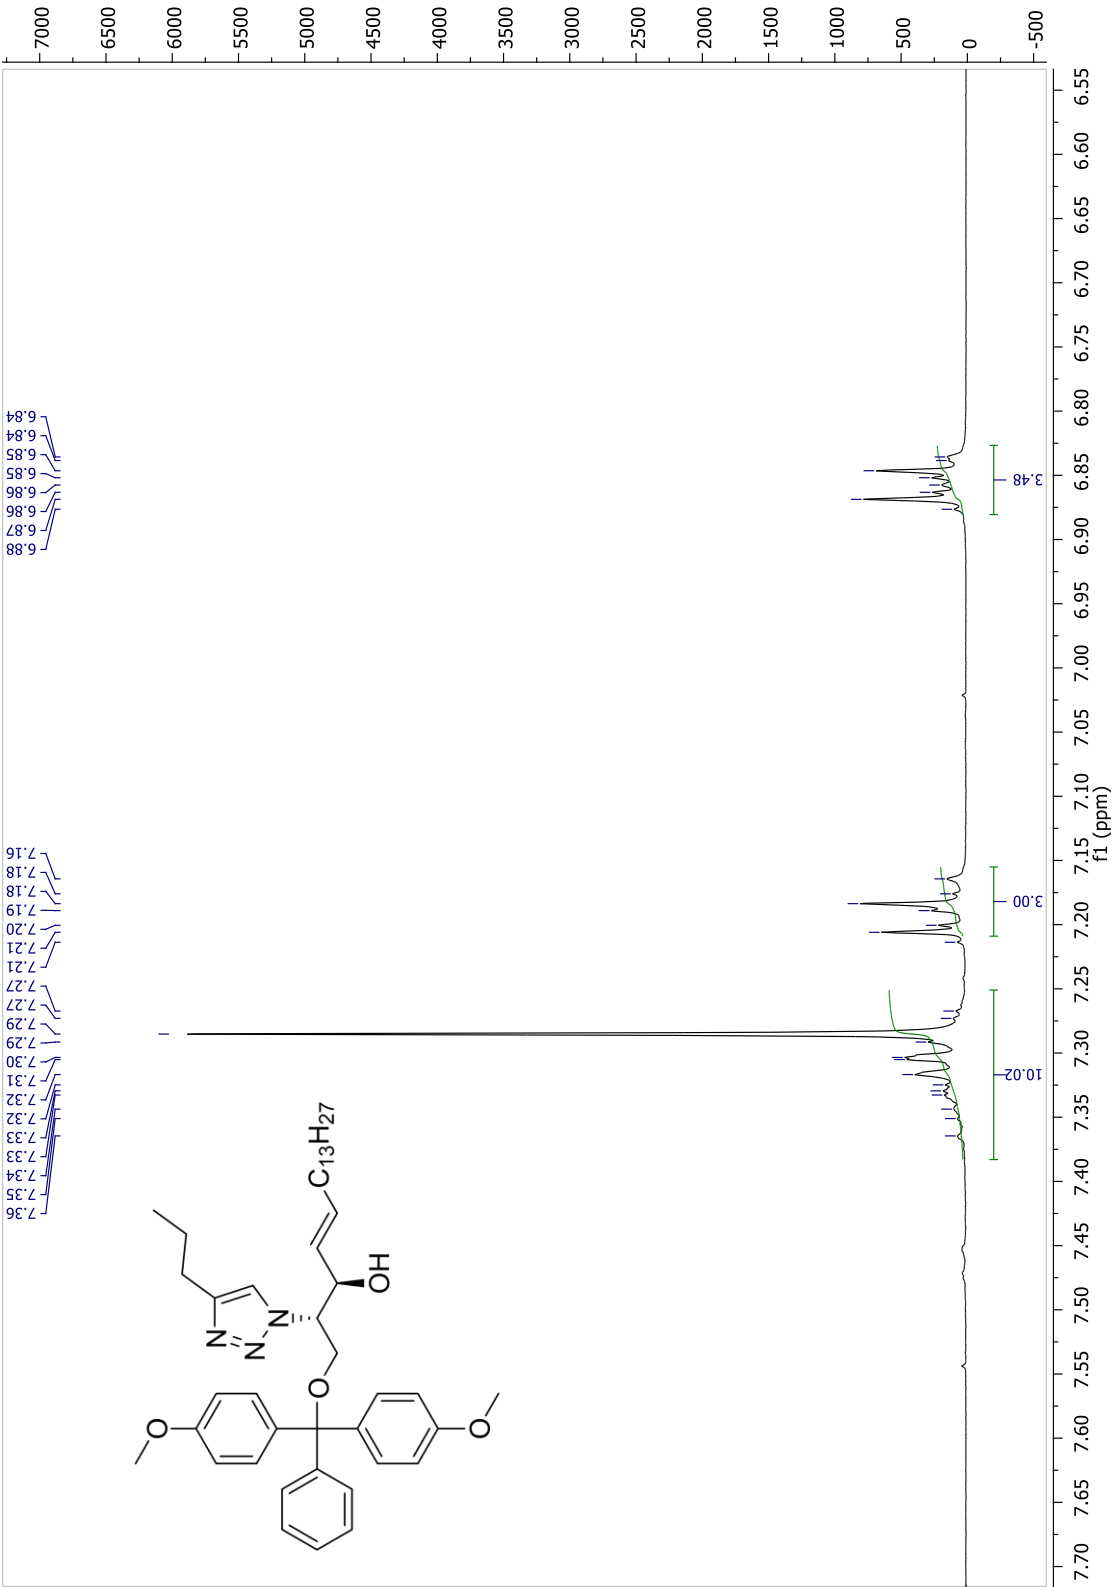

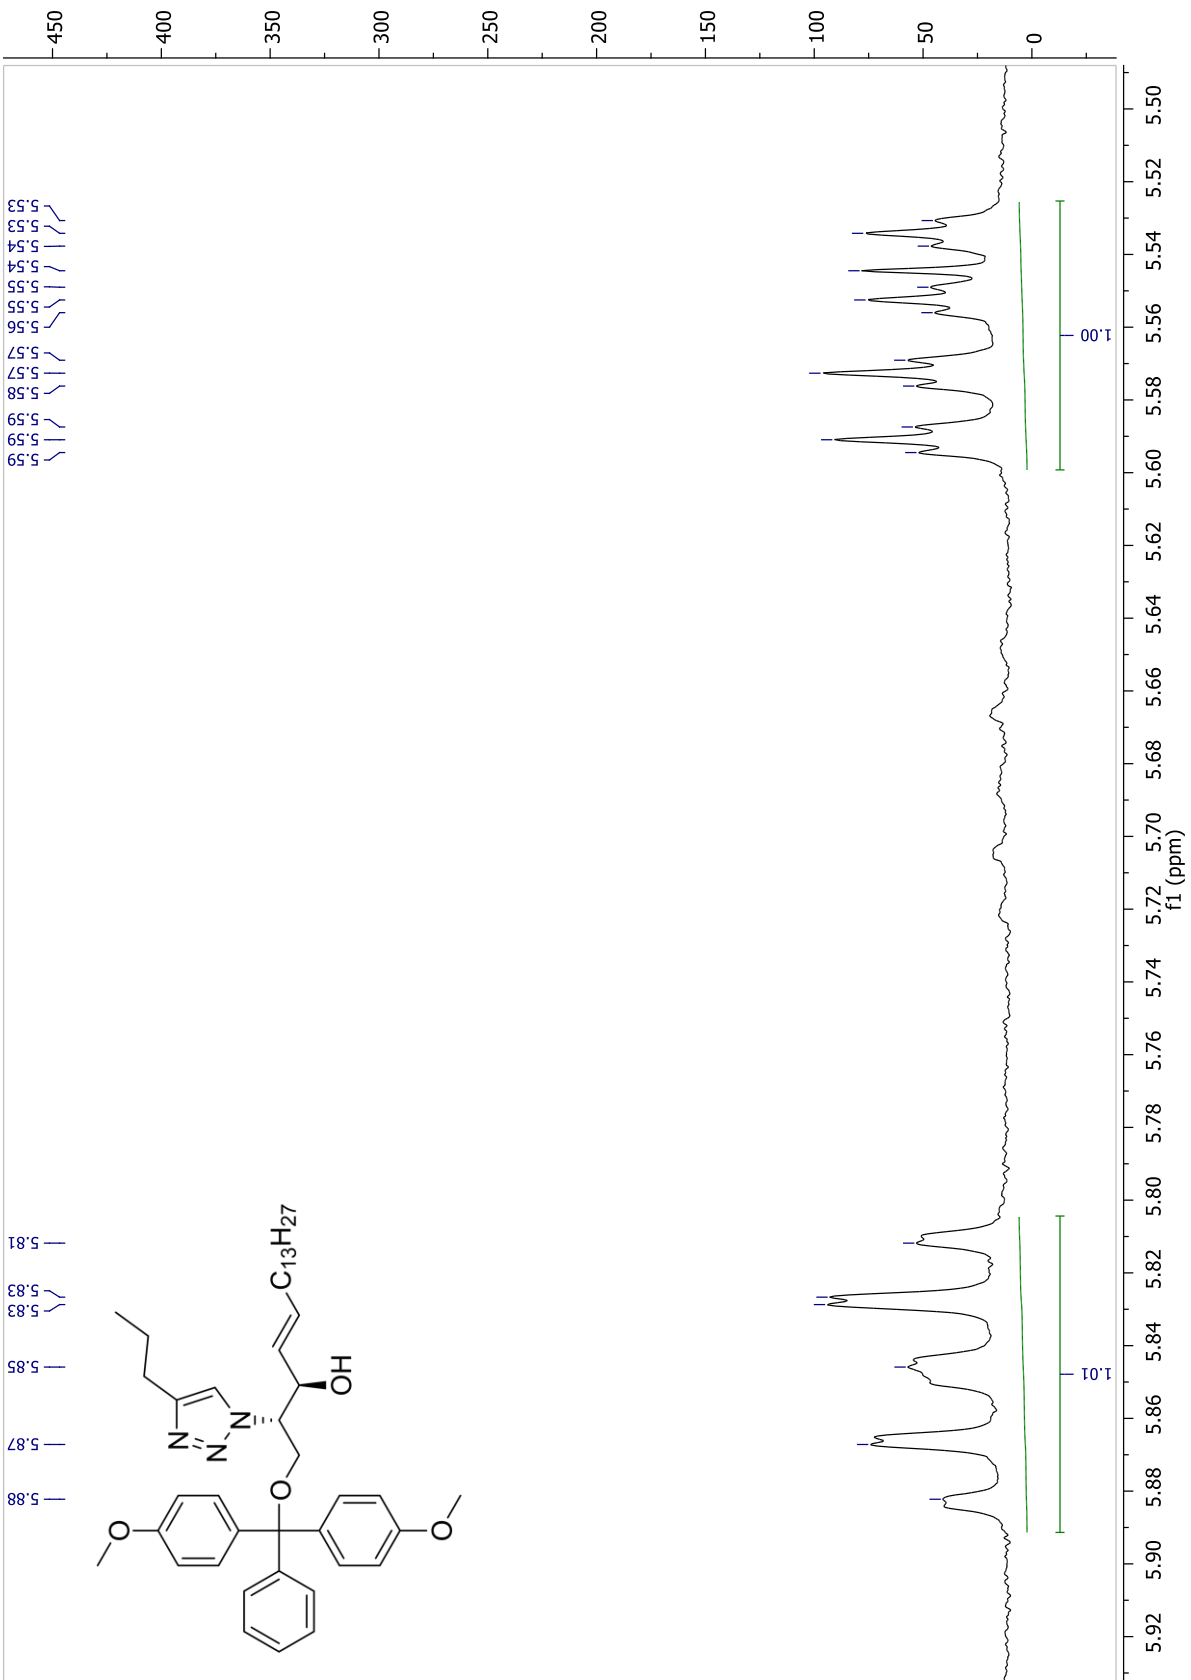

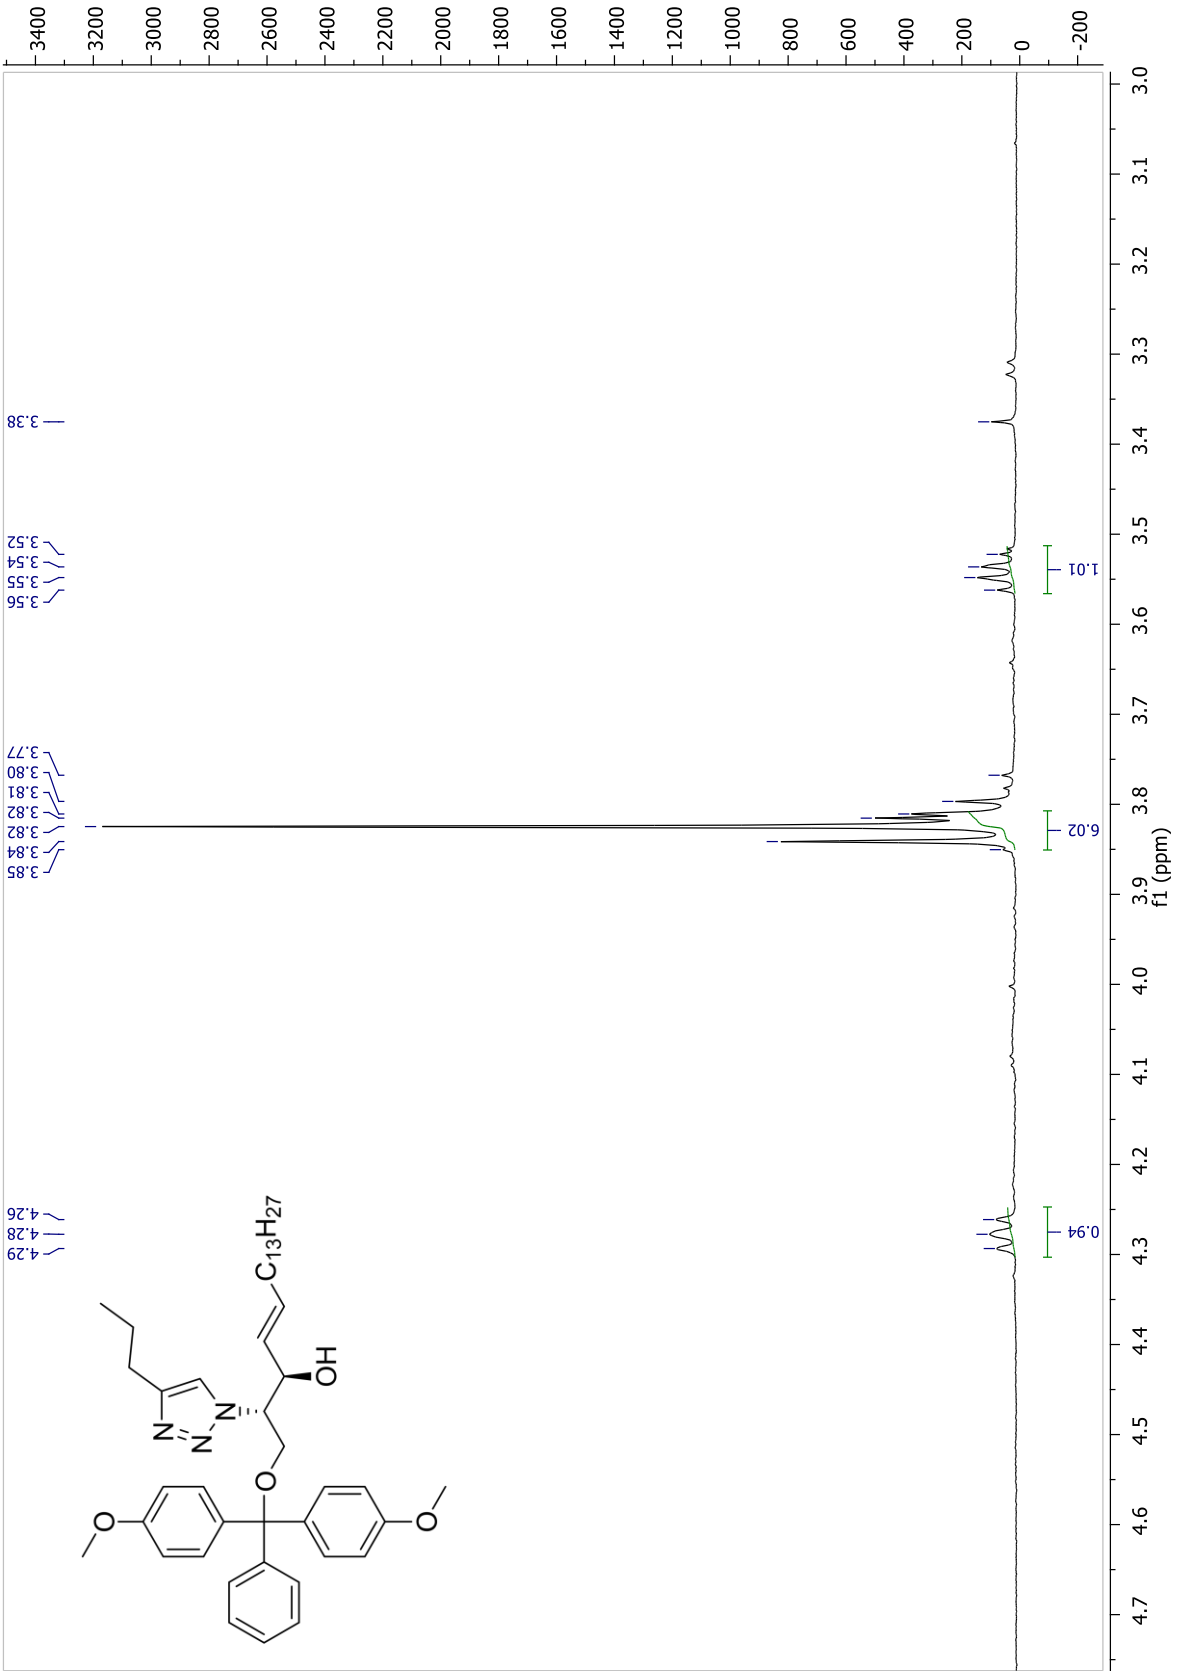

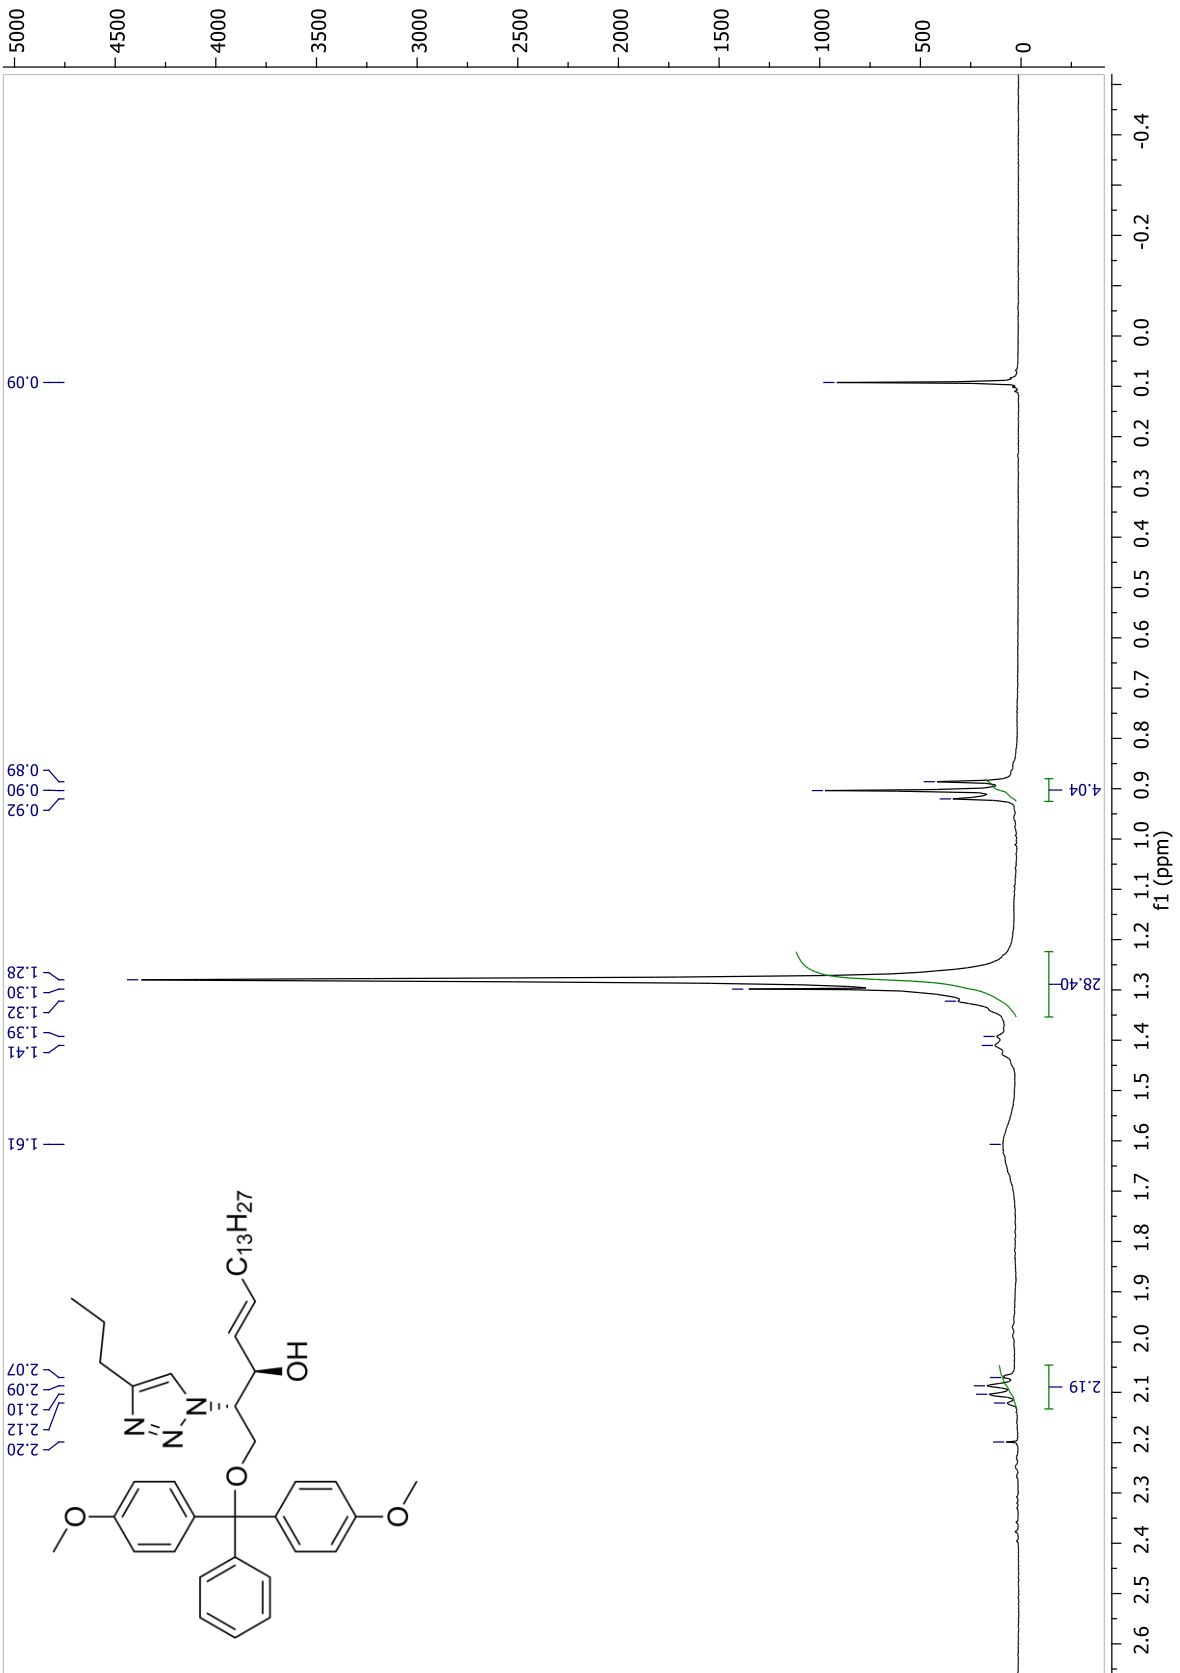

<sup>13</sup>C NMR Spectrum of Compound **9**

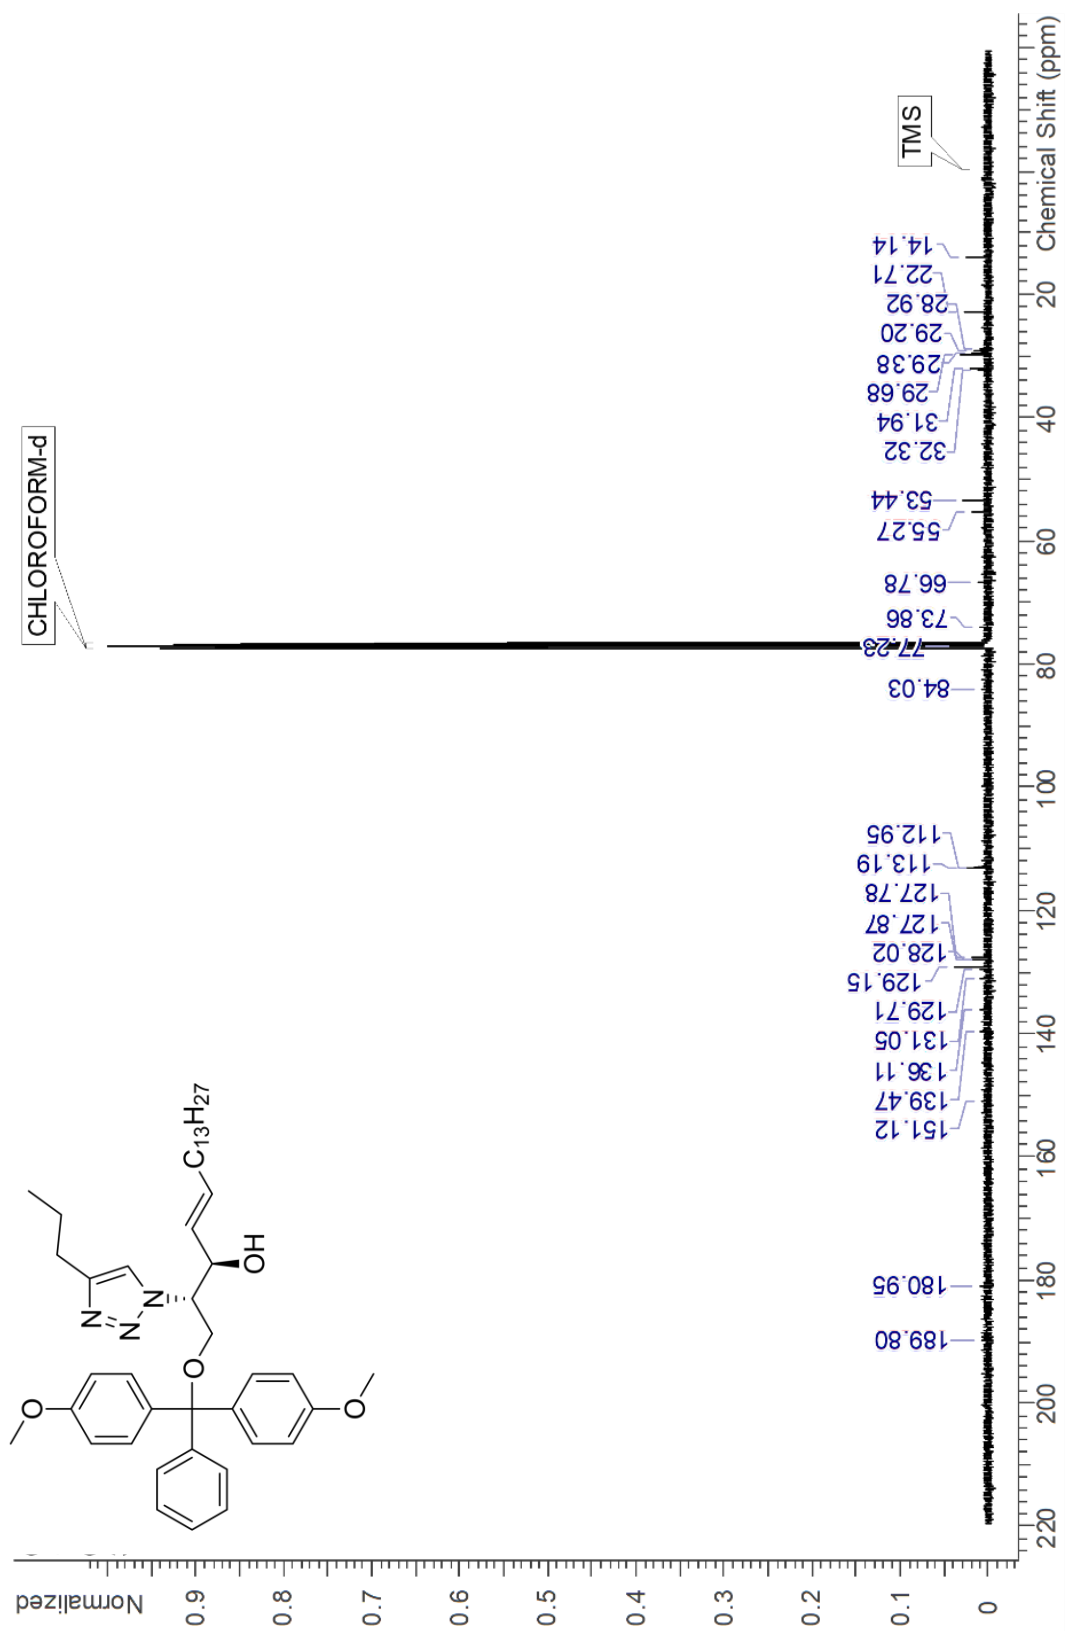

# <sup>1</sup>H NMR Spectrum of Compound 10

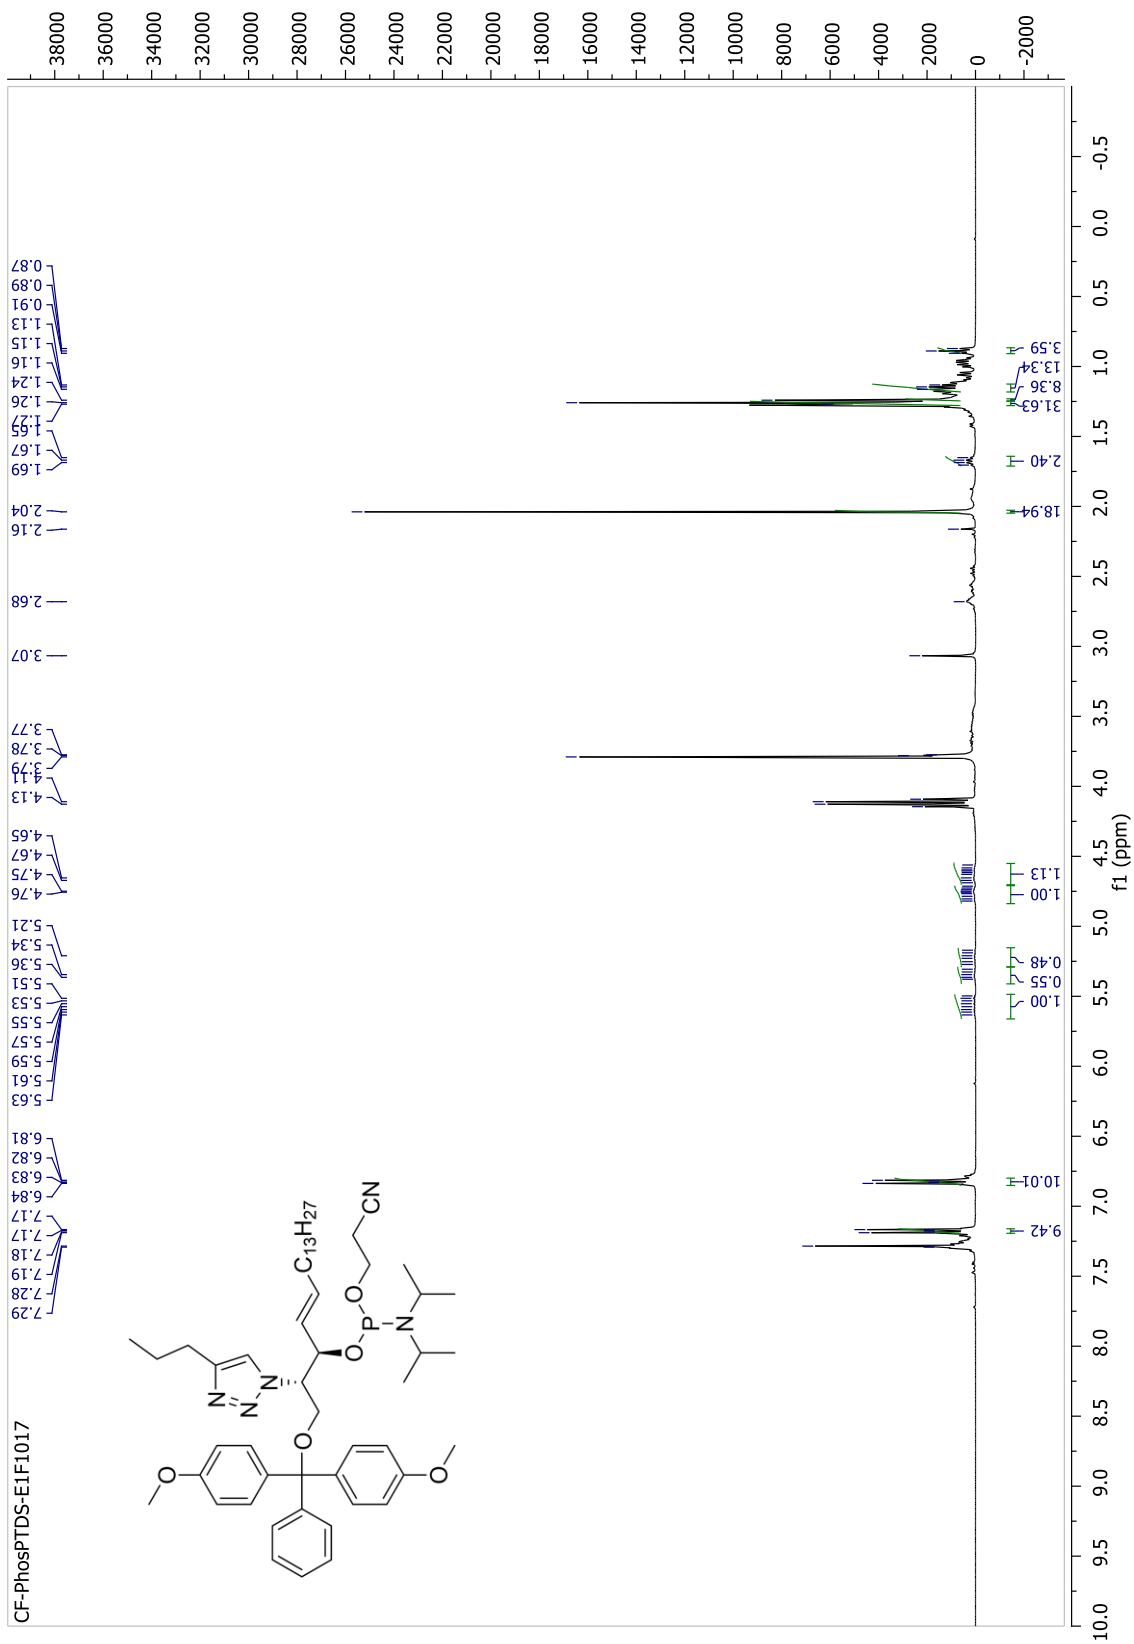

# <sup>31</sup>P NMR Spectrum of Compound 10

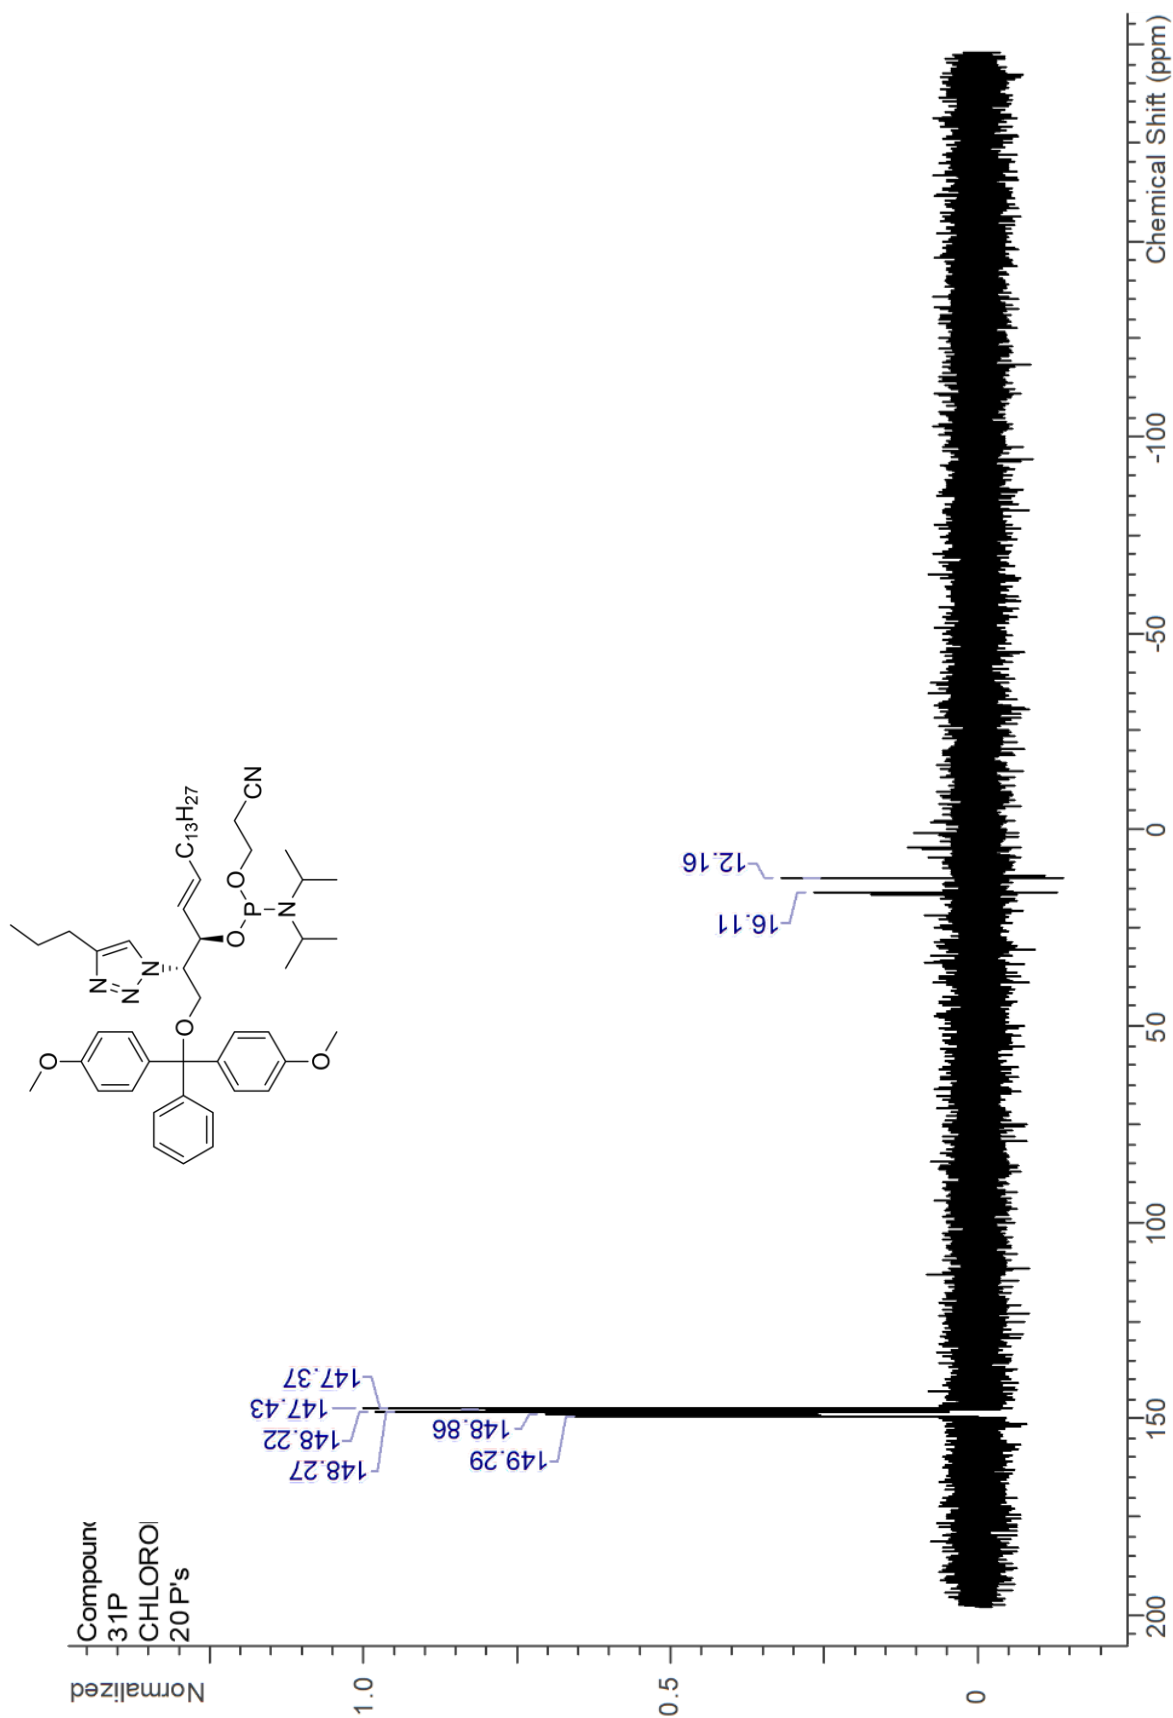



# QTOF-LC/MS spectrum

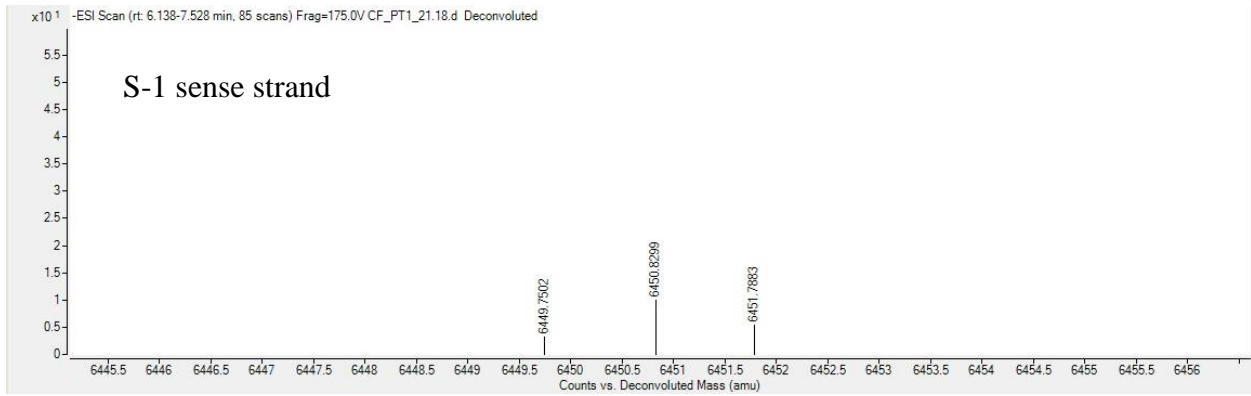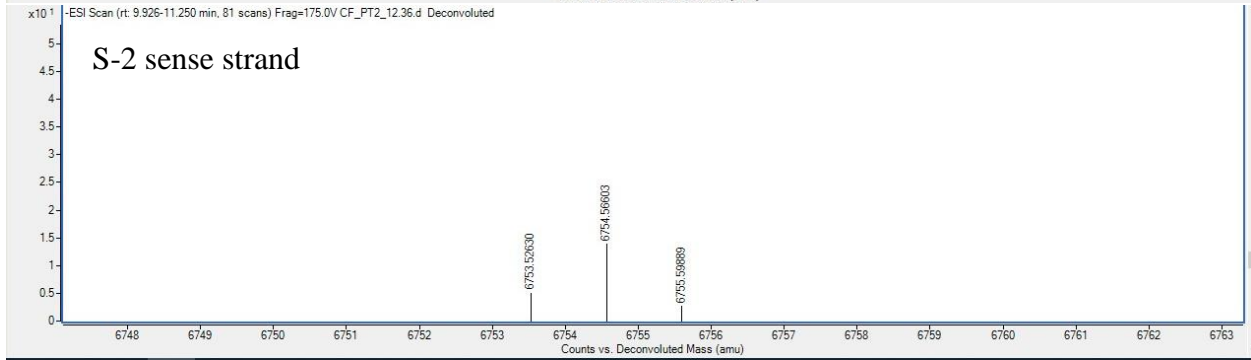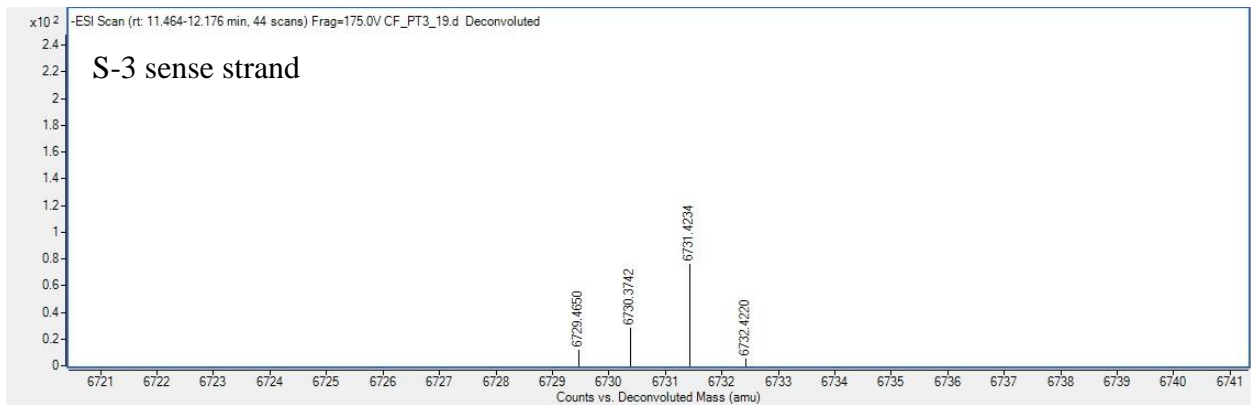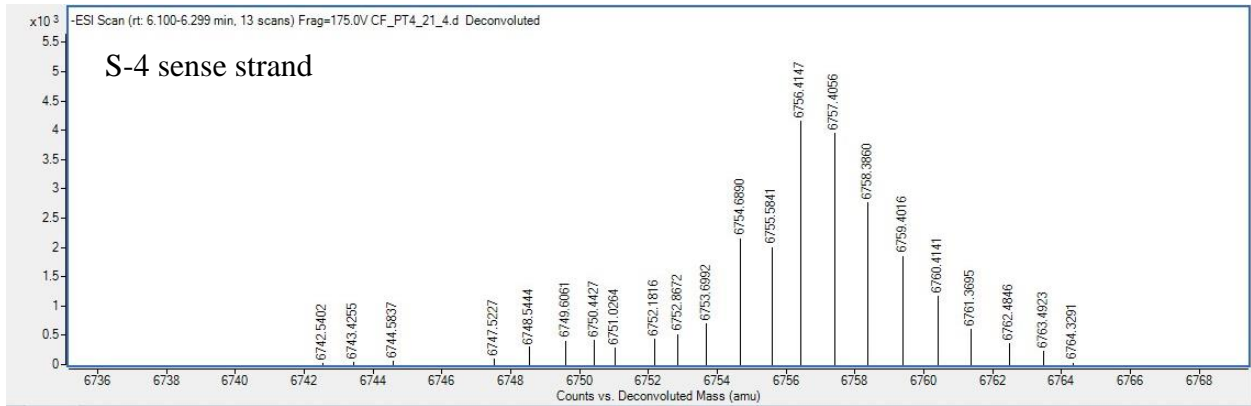

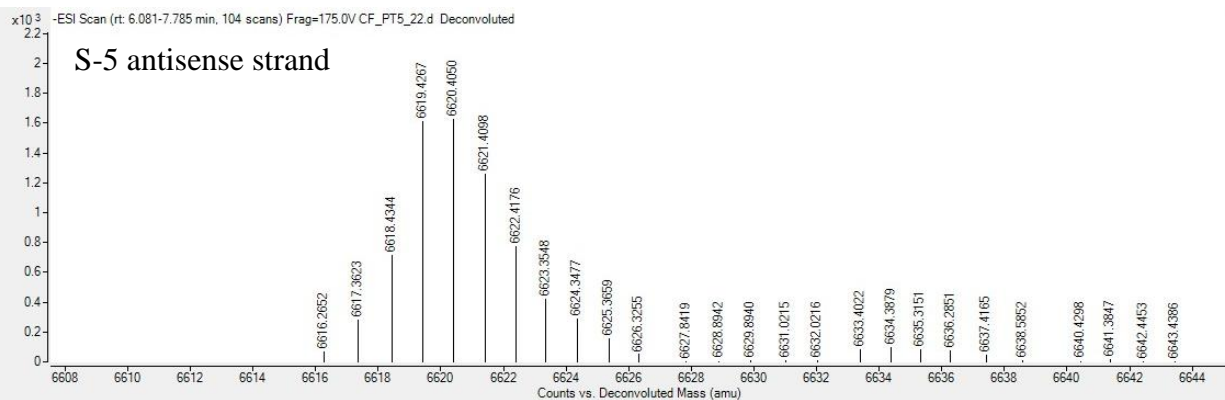

## HPLC data

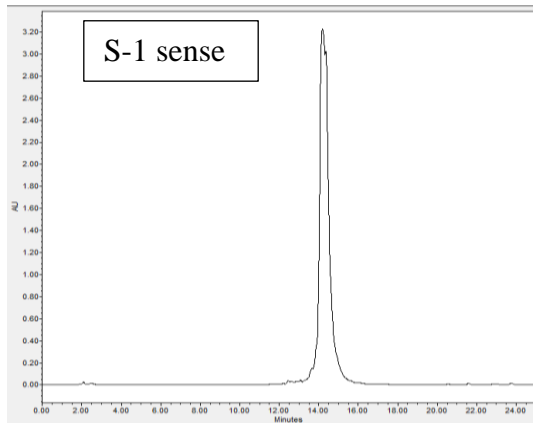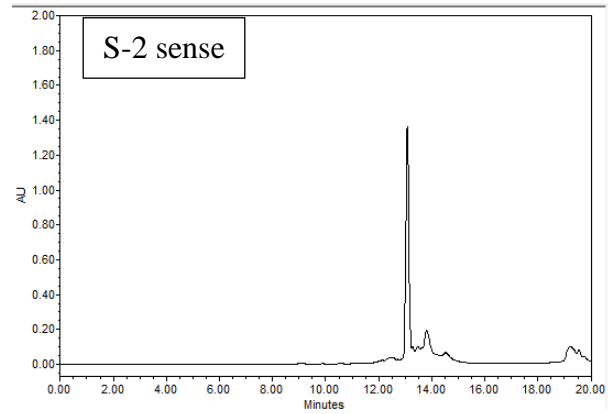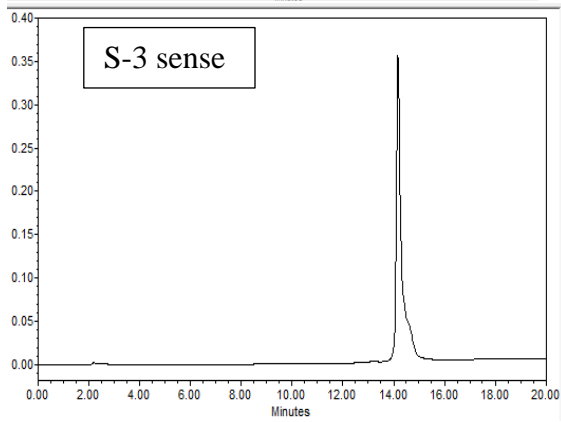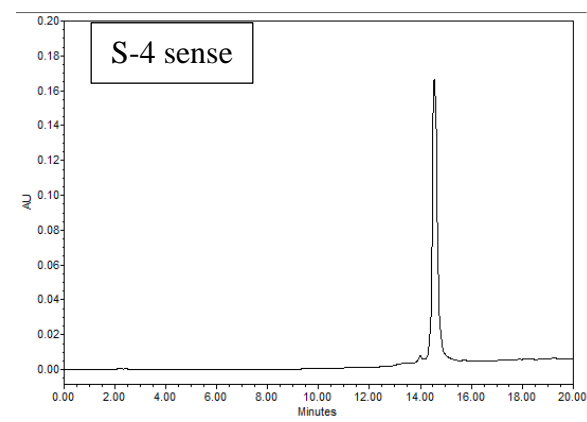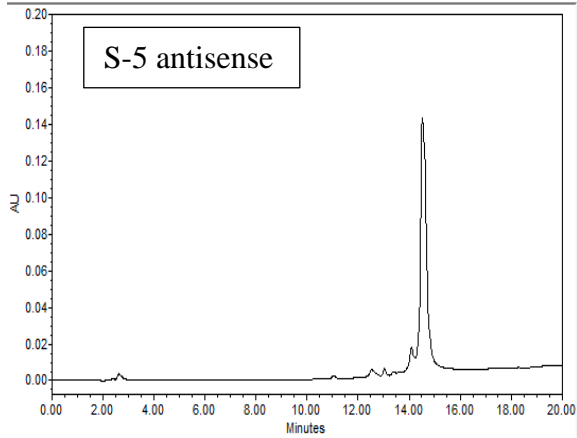

## Melting Temperature Curves

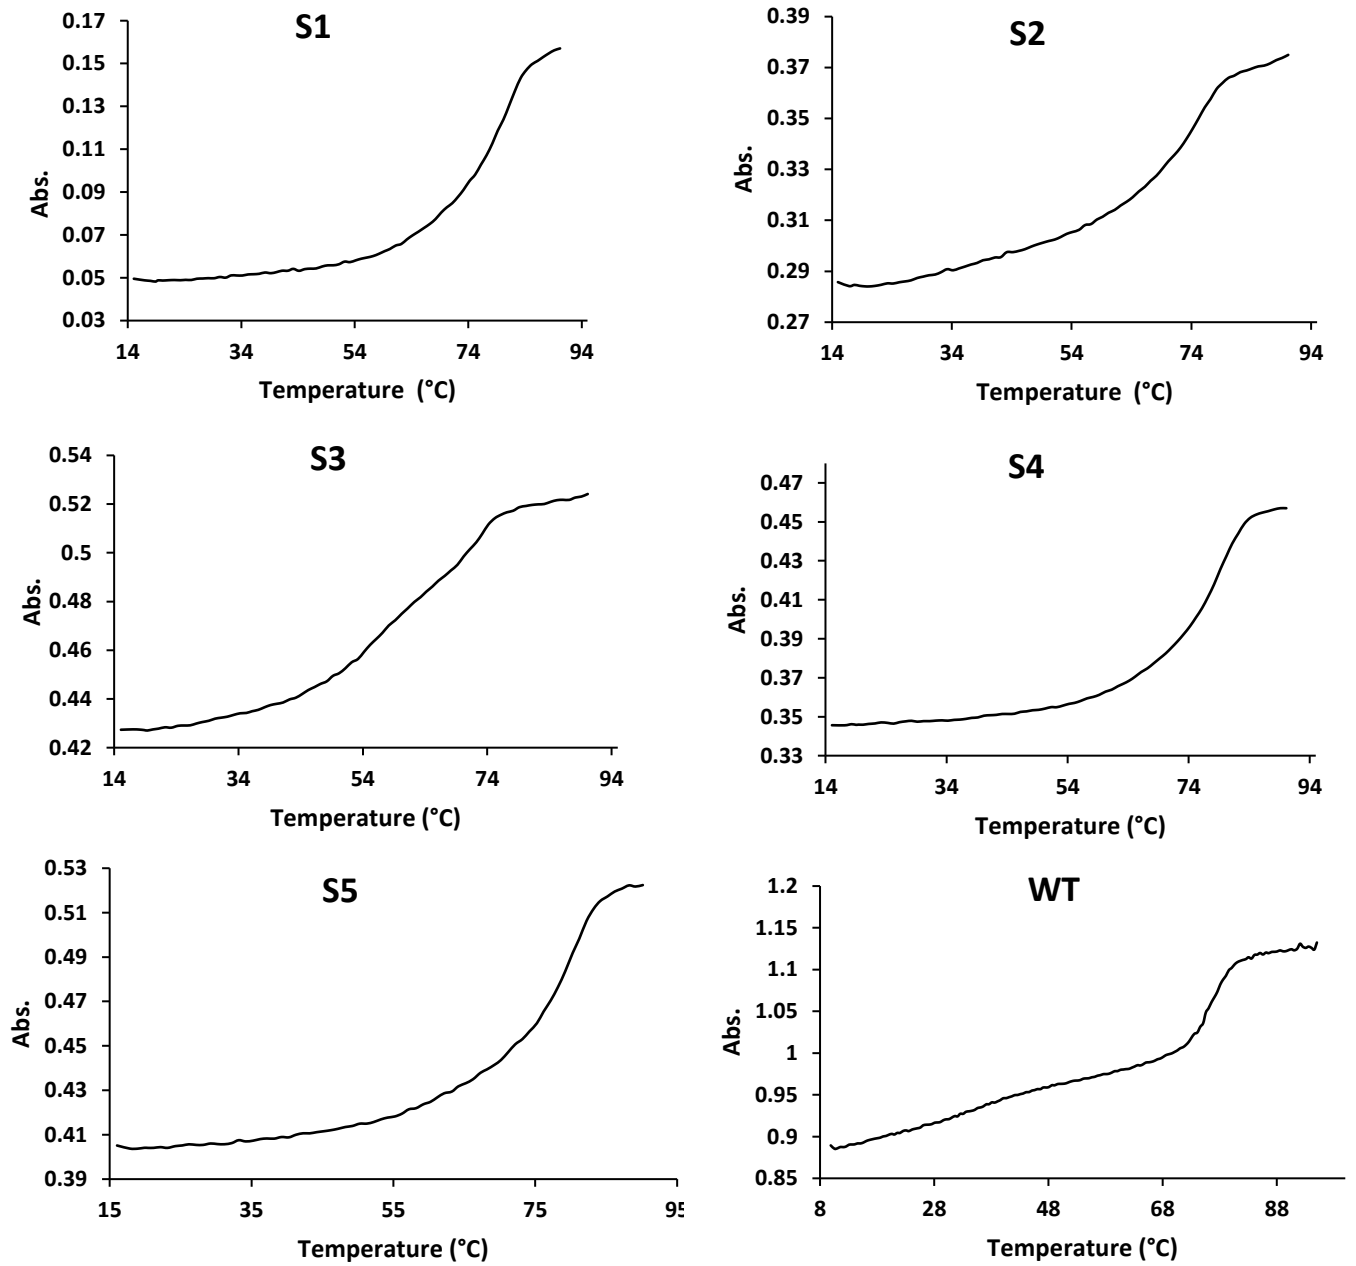

Supplement: d2ob02099h1.pdf [file d2ob02099h1.pdf]
